1 **Title:** Crop residues in wheat-oilseed rape rotation system: a pivotal, shifting platform for  
2 microbial meetings

3

4 **Authors:** Lydie Kerdraon <sup>1</sup>, Marie-Hélène Balesdent <sup>1</sup>, Matthieu Barret <sup>2</sup>, Valérie Laval <sup>1</sup> \*,  
5 Frédéric Suffert <sup>1</sup> \*

6 \* contributed equally

7

8 **Address:** <sup>1</sup> UMR BIOGER, INRA, AgroParisTech, Université Paris-Saclay, 78850 Thiverval-  
9 Grignon, France; <sup>2</sup> UMR IRHS, INRA, Agrocampus Ouest, Université d'Angers, 49071  
10 Beaucouzé, France

11 \* frederic.suffert@inra.fr; tel +33 (0)1 30 8154 35; ORCID 0000-0001-6969-3878

12 \* valerie.laval@inra.fr; tel +33 (0)1 30 81 45 16; ORCID 0000-0002-3667-3878

13

## 14 **Abstract**

15 Crop residues are a crucial ecological niche with a major biological impact on agricultural  
16 ecosystems. In this study we used a combined diachronic and synchronic field experiment  
17 based on wheat-oilseed rape rotations to test the hypothesis that plant is a structuring factor of  
18 microbial communities in crop residues, and that this effect decreases over time with their  
19 likely progressive degradation and colonization by other microorganisms. We characterized an  
20 entire fungal and bacterial community associated with 150 wheat and oilseed rape residue  
21 samples at a plurennial scale by metabarcoding. The impact of plant species on the residue  
22 microbiota decreased over time and our data revealed turnover, with the replacement of  
23 oligotrophs, often plant-specific genera (such as pathogens) by copiotrophs, belonging to  
24 more generalist genera. Within a single cropping season, the plant-specific genera and species  
25 were gradually replaced by taxa that are likely to originate from the soil. These changes

26 occurred more rapidly for bacteria than for fungi, known to degrade complex compounds.  
27 Overall, our findings suggest that crop residues constitute a key fully-fledged microbial  
28 ecosystem. Taking into account this ecosystem, that has been neglected for too long, is  
29 essential, not only to improve the quantitative management of residues, the presence of which  
30 can be detrimental to crop health, but also to identify groups of beneficial micro-organisms.  
31 Our findings are of particular importance, because the wheat-oilseed rape rotation, in which  
32 no-till practices are frequent, is particularly widespread in the European arable cropping  
33 systems.

#### 34 **Keywords**

35 community succession, microbial diversity, oilseed rape, residue microbiota, wheat

## 36 **Background**

37       Crop residues are an essential living element of agricultural soils. Smil [1] stressed that  
38 they “should be seen not as wastes but as providers of essential environmental services,  
39 assuring the perpetuation of productive agrosystems”. When left in the field in the period  
40 between two successive crops, rather than being buried immediately, crop residues contribute  
41 to the formation of soil organic carbon, improve soil structure, prevent erosion, filter and  
42 retain water, reduce evaporation from the soil surface, and increase the diversity and activity  
43 of micro-organisms in the ground [2]. No-till practices are becoming increasingly widespread,  
44 as they take advantage of these attributes [3]. However, such practices are often considered  
45 likely to increase the risk of disease epidemics [4–6]. Indeed, several leaf-, stem-, head-, and  
46 fruit-infecting micro-organisms, classified as “residue-borne” or “stubble-borne” pathogens,  
47 are dependent on host residues for survival during the period between successive crops and  
48 for the production of inoculum for their next attack [7, 8]. The epidemiological contribution  
49 of residues as an effective source of inoculum is well-established but difficult to quantify [e.g.  
50 9] and generalise, because the nature of survival structures depends on the biology of the  
51 species. The situation is rendered even more complex by the presence of several species  
52 reported to act as crop pathogens in plants as endophytes, without symptom development in  
53 the plant, and in the soil and plant residues as saprophytes. Taking into account the inoculum  
54 from stubble-borne pathogens and possible competition with other micro-organisms, it  
55 appears likely that the expression of a disease is the consequence of an imbalance between a  
56 potentially pathogenic species and the rest of the microbial community, rather than the  
57 consequence of the mere presence of this species [10].

58       Residues constitute a crucial ecological niche, not only for pathogenic species, but also  
59 for non-pathogenic and beneficial species. Residues can be viewed as both a fully-fledged  
60 matrix and a transient compartment, because they originate from the plant (temporal link), are

61 in close contact with the soil (spatial link) and degrade over the following cropping season, at  
62 rates depending on the plant species, the cropping practices used [11], and the year (climate  
63 effect). It remains unknown whether the succession of microbial communities in residues is  
64 driven primarily by plant tissue degradation or edaphic factors [12]. Many studies have  
65 investigated the structure of the microbial communities present during the life cycle of the  
66 plant [e.g. 13–15], but few have investigated the microbiota associated with plant residues.  
67 Several ecological studies have investigated the impact of the residue compartment on the  
68 structure of soil microbial communities [2, 16–19], but not the impact of the soil compartment  
69 on structure of the residue communities. The detritosphere, defined as the part of the soil  
70 attached to residues [12, 20, 21], is the most extensive and broad hotspot of microbial life in  
71 the soil [22]. The residue compartment and the detritosphere are located in close physical  
72 proximity but are considered by microbiologists to be separate trophic and functional niches  
73 [23]. A description of the residue communities and the specific changes in these communities  
74 over time might, therefore, help agronomists to understand the impact of cropping practices  
75 on crop productivity. Fungi and bacteria play important roles in the degradation of plant  
76 tissues in debris (cellulose, hemicellulose, lignin), but the interactions between them within  
77 the microbial community remain unclear, due to the lack of information about their origins  
78 (air-borne, soil-borne or plant-borne), their individual functions and the drivers of community  
79 structure in residues.

80 Crop rotation induces changes in the composition of the soil microbial community and  
81 usually reduces pathogen pressure [e.g. 18]. For instance, wheat yields benefit from “break  
82 crops” such as oilseed rape or other non-host crops to break the life-cycle of wheat-specific  
83 pathogens [24]. We focused here on the wheat-oilseed rape rotation, one of the most widely  
84 used cropping systems in Europe. In 2017, the areas under bread wheat and oilseed rape in  
85 France were 5.0 million ha and 1.4 million ha [25], respectively. As oilseed rape usually



86 recurs every three years in the rotation and is used almost systematically either directly before  
87 or directly after wheat, we estimate that this classical rotation is used on almost 4.2 million ha  
88 every year. Half the area occupied by these two crops is now grown without tillage, with at  
89 least some of the residues of the preceding crop left on the soil [26]. The issue addressed here  
90 is thus directly relevant to more than 2 million ha, or about one tenth of the total arable area in  
91 France.

92 In this study, we deliberately focused on crop residues as a neglected, transient, but  
93 fully-fledged half-plant/half-soil compartment without describing the soil microbial  
94 communities, considering that it has been already performed in several studies [e.g. 27, 28].  
95 We tested the specific hypothesis that plant is a structuring factor of bacterial and fungal  
96 communities in residues, and that this effect decreases over time, as contact with the soil  
97 induce progressive colonization of residues by other microorganisms. Over the last few years,  
98 high-throughput metabarcoding has become an indispensable tool for studying the ecology of  
99 such complex microbial communities [29], partly due to the difficulties in isolating fungal and  
100 bacterial species and growing them in axenic conditions. We used this approach to describe  
101 and compare changes in the microbial community of wheat and oilseed-rape residues left on  
102 the soil surface of three cultivated fields during two cropping seasons. We investigated  
103 whether the three main determinants (plant species, cropping season, and rotation) of the  
104 diversity of fungal and bacterial communities affected the microbiota of crop residues.

105

## 106 **Methods**

### 107 **Experimental design**

108 *Field plots and rotations* – An extensive field experiment based on a wheat (W)-oilseed  
109 rape (O) rotation cropping system was carried out during the cropping seasons of 2015-2016  
110 and 2016-2017 at the Grignon experimental station (Yvelines, France; 48°51'N, 1°58'E). This

111 area is characterised by an oceanic climate (temperate, with no dry season and a warm  
112 summer). A combined diachronic and synchronic strategy [30] was used to investigate the  
113 dynamics of the residue microbial communities both over a two-year period on the same plot  
114 and along a chronosequence substituting spatial differences (three plots) for time differences.  
115 A first monoculture plot (WWW) was sown with the winter wheat cultivar Soissons. This plot  
116 had been cropped with wheat since 2007 and was used in previous epidemiological studies  
117 focusing on the impact of wheat debris on the development of *Septoria tritici* blotch [e.g. 31,  
118 32, 33]. Two other plots were cropped with oilseed rape cv. Alpaga and wheat cv. Soissons in  
119 rotation (OWO, adjacent to the WWW plot, and WOW, located 400 m away; Fig. 1). The size  
120 of the three plots was identical (20 m × 100 m). The OWO and WWW plots are characterized  
121 by a silty clay loam soil and plot WOW is characterized by a silty loam soil. Soil texture of  
122 the three plots is presented in Additional Table S1. The three plots were not tilled during the  
123 two cropping seasons. The wheat and oilseed rape residues were left on the soil surface after  
124 harvest. Soil was superficially disturbed to a depth of 10 cm with a disc harrow 6 weeks later  
125 (late September), leaving a large portion of residue on the surface. Crops were managed in a  
126 conventional way following local practices (nitrogen fertilization, insecticide and herbicide  
127 treatments). No fungicide was sprayed on the leaves during the study.

128 *Residue sampling* - Wheat and oilseed rape residues from the previous crop were  
129 collected over the two cropping seasons. The changes in the microbial communities during  
130 residue degradation were described on the basis of four sampling periods each year (October,  
131 December, February, and May). Sampling dates are presented in Additional table S2. A  
132 supplementary sample was taken in July 2016, and *a posteriori* in July 2017, to characterise  
133 the plant microbiota before the residues came into contact with the soil. For each sampling  
134 period, residues samples were collected at soil surface from five points in each plot, 20 m  
135 apart, along a linear transect (Fig. 1). Each sample was composed of twelve pieces of wheat

136 residue or four pieces of oilseed rape residue. The five sampling points were located at the  
137 same place in the plots during the two years of the experiment.

138 *DNA extraction* - Residues were cut to take off remaining roots, rinsed with water to  
139 remove the soil and air-dried in laboratory conditions. They were then cut into small pieces,  
140 pooled in a 50 mL bowl and crushed with a Retsch™ Mixer Mill MM 400 for 60 seconds at  
141 30 Hz in liquid nitrogen, in a zirconium oxide blender. The crushed powder was stored in  
142 50 mL Falcon tubes at -80°C until DNA extraction. We transferred 40 mg of crushed residues  
143 to a 2.0 mL Eppendorf tube, which was stored to -80°C. Total environmental DNA (eDNA)  
144 was extracted according to the TriZol® Reagent protocol (Invitrogen, according to the  
145 manufacturer's instructions). Two independent extractions were performed per sample, giving  
146 a total of 300 eDNA samples. The two extractions were considered as technical replicates.

147

#### 148 **PCR and Illumina sequencing**

149 Fungal and bacterial community profiles were estimated by amplifying ITS1 and the  
150 v4 region of the 16S rRNA gene, respectively. Amplifications were performed with the  
151 ITS1F/ITS2 [34] and 515f/806r [35] primers. All PCRs were run in a reaction volume of 50  
152 µL, with 1x Qiagen Type-it Multiplex PCR Master Mix (Type-it® Microsatellite PCR kit Cat  
153 No./ID: 206243), 0.2 µM of each primer, 1x Q-solution® and 1 µL DNA (approximately 100  
154 ng). The PCR mixture was heated at 95°C for 5 minutes and then subjected to 35 cycles of  
155 amplification [95°C (1 min), 60°C (1 min 30 s), 72°C (1 min)] and a final extension step at  
156 72°C (10 min). PCR products were purified with Agencourt® AMPure® XP (Agencourt  
157 Bioscience Corp., Beverly, MA). A second round of amplification was performed with 5 µL of  
158 purified amplicons and primers containing the Illumina adapters and indexes. PCR mixtures  
159 were heated at 94°C for 1 min, and then subjected to 12 cycles of amplification [94°C (1  
160 min), 55°C (1 min), 68°C (1 min)] and a final extension step at 68°C (10 min). PCR products

161 were purified with Agencourt® AMPure® XP and quantified with Invitrogen QuantIT™  
162 PicoGreen®. Purified amplicons were pooled in equimolar concentrations in five independent  
163 batches, and the final concentration of each batch was determined with the qPCR NGS library  
164 quantification kit (Agilent). The five independent batches were sequenced in five independent  
165 runs with MiSeq reagent kit v3 (300bp PE).

166

### 167 **Sequence processing**

168 Fastq files were processed with DADA2 v1.6.0 [36], using the parameters described in  
169 the workflow for “Big Data: Paired-end” [37]. The only modification made relative to this  
170 protocol was a change in the truncLen argument according to the quality of the sequencing  
171 run. Each run was analysed separately. Taxonomic affiliations for amplicon sequence variants  
172 (ASV) generated with DADA2 were assigned with a naive Bayesian classifier on the RDP  
173 trainset 14 for bacteria [38] and the UNITE 7.1 database for fungi [39].

174 Only ASV detected in both technical replicates were conserved for further analyses  
175 [40], to ensure robustness. ASV classified as “Cyanobacteria/Chloroplast”, or not classified at  
176 the phylum level were discarded from the datasets. This resulted in suppression of 1.2% of  
177 reads for fungi (4.2% of unclassified ASV), and 1.5% of reads for bacteria (4.9% of  
178 unclassified ASV and 1.3% of ASV affiliated to Cyanobacteria/Chloroplast). The remaining  
179 ASV were normalised according to the proportion of reads within each sample [41].

180

### 181 **Microbial community analyses**

182 Microbial community profiles were obtained for 100 wheat residue samples and 50  
183 oilseed rape residue samples. The diversity of each sample was estimated by calculating the  
184 Shannon index with the ggpubr package in R [42]. A Kruskal-Wallis test was performed to  
185 assess significant differences in residue diversity with time, between plants within a rotation

186 and between cropping seasons. In cases of significant differences, Wilcoxon pairwise tests  
187 were performed to compare sampling periods. A Wilcoxon pairwise test was performed to  
188 assess the effects of “plant” and “plant within a rotation” on Shannon index for each cropping  
189 season. Divergences were considered significant if  $p < 0.05$ .

190 The effects of plant, cropping season, sampling period and biological sample on  
191 community composition were assessed with PERMANOVA using the Adonis function of the  
192 vegan R package (version 2.4-4 [44]) and visualized by multidimensional scaling (MDS) on  
193 the Bray-Curtis dissimilarity index with the phyloseq package in R (version 1.22.3 [43]).  
194 After the aggregation of ASV for each sampling condition “sampling period/cropping year \*  
195 crop within a rotation”, the betapart R package [45] was used to determine whether temporal  
196 changes in community composition were due to turnover (i.e. replacement of ASV between  
197 two sampling periods) or nestedness (gain or loss of ASV between two sampling periods).  
198 The effect of the plant on the microbial communities associated with residues during  
199 degradation was also assessed with PERMANOVA on each sampling period, for each year.

200 The genus composition of fungal and bacterial communities was assessed with a  
201 cladogram based on genus names. Only genera observed in three biological samples harvested  
202 on the same plot were incorporated into the cladogram. A cladogram representing the number  
203 of ASV for each genus, read percentage, occurrence and distribution for each sample, was  
204 constructed with the Interactive Tree Of Life (iTOL [46]) online tool for phylogenetic trees.

205 To illustrate taxonomic changes over time, especially between plant-derived  
206 communities and communities involved later in the colonization of the residues, we focused  
207 on seasonal shifts (increase, decrease or stability) in the relative abundance of a selection of  
208 some fungal and bacterial genera and tested their statistical significance (Wilcoxon tests  
209 between sampling periods).

210

## 211 **Results**

212 The bacterial and fungal communities associated with wheat (W) and oilseed rape (O) crop  
213 residues were characterised on three plots: a wheat monoculture (WWW), and two oilseed  
214 rape-wheat rotation plots (WOW and OWO) (Fig. 1). We assessed the composition of these  
215 microbial communities four times per year, during two consecutive cropping seasons (in  
216 October, December, February and May). An additional time point (in July) was also included  
217 for identification of the micro-organisms present on the plant before contact with the soil  
218 (Additional Table S2). An analysis of raw sequence datasets for the 150 samples of wheat and  
219 oilseed rape residues collected over the two cropping seasons resulted in the grouping of  
220 14,287,970 bacterial and 9,898,487 fungal reads into 2,726 bacterial and 1,189 fungal  
221 amplicon sequence variants (ASV). ASV not detected in both technical replicates (5.4% of  
222 bacterial reads and 1.5% of fungal reads) were removed from the datasets. Total number of  
223 reads remaining after ASV filtering is presented in Additional Table S3.

224

### 225 **Alpha diversity**

226 *Fungal and bacterial diversity was influenced by cropping season – Diversity*  
227 *dynamics, assessed by calculating the Shannon index, differed between the two cropping*  
228 *seasons and between fungi and bacteria. It was influenced only slightly by the type (or the*  
229 *absence) of rotation (Fig. 2). Fungal diversity increased over time during the first cropping*  
230 *season, whereas the differences between the samples in the second year did not reflect a*  
231 *gradual increase. Bacterial diversity did not increase during the first cropping season, except*  
232 *for wheat residues in rotation (WOW). During the second year, diversity increased from*  
233 *December to May, for all conditions. The climatic conditions during residue degradation*  
234 *(Additional Table S4) or differences in initial diversity on the plant before harvest may*  
235 *explain the less marked trends observed between the two cropping seasons.*

236 *Fungal and bacterial diversity are influenced by plant species and rotation – Oilseed*  
237 rape residues supported less fungal diversity than wheat residues in 2015-2016, but not in  
238 2016-2017 (Wilcoxon pairwise test, Additional Table S5). The opposite trend was observed  
239 for bacteria: bacterial diversity in oilseed rape was significantly lower than that in wheat in  
240 2016-2017, but there was no difference in bacterial diversity between the two crops in 2015-  
241 2016 (Additional Table S5). In addition, the Shannon index was significantly higher in wheat  
242 grown in monoculture than in wheat grown in rotation for both years for fungi and in 2015-  
243 2016 for bacteria.

244

#### 245 **Comparison of microbial communities associated with residues**

246 We analysed the effects of plant species, rotation, cropping season and sampling  
247 period on communities, using the Bray-Curtis index and PERMANOVA. Differences between  
248 sample replicates collected from the same plot during the same sampling period were not  
249 significant for bacterial or fungal communities (Table 1). Thus, there was remarkably little  
250 heterogeneity between the samples from the same plot, and the number of biological samples  
251 was, therefore, sufficient to assess differences due to the variables of interest (i.e. plant  
252 species, rotation, cropping season and sampling period).

253 *The structure of bacterial and fungal communities is influenced by plant species and*  
254 *rotation – Oilseed rape and wheat residues presented different sets of ASV, for both bacterial*  
255 *and fungal communities (Fig. 3). Plant species was the main factor explaining differences*  
256 *between the communities, accounting for 22.7% of the variance for bacteria and 32.4% for*  
257 *fungi, as established with PERMANOVA (Table 1). The percentage of variance explained by*  
258 *the plant decreased over time for fungal community structure (e.g. from 61% in July 2016 to*  
259 *40% in May), while for bacteria the percentage of variance explained by the plant is rather*  
260 *stable. The percentages of variance associated with the plant for each date are presented in*



261 Additional Table S6. For wheat, the type of rotation (i.e. rotation or monoculture) accounted  
262 for 10.5% of the variance for fungal community composition and 6.6% of the variance for  
263 bacterial community composition (Table 1).

264 *Community structures change over time* – Cropping season was the main temporal  
265 factor underlying changes in community structure, accounting for 16.4% of the variance for  
266 bacteria and 12.5% of the variance for fungi, as established with PERMANOVA (Table 1).  
267 Sampling period also had a significant impact on community composition, accounting for  
268 17.2% of the variance for bacteria and 7.2% of the variance for fungi. Theoretically, changes  
269 in ASV composition result from turnover (replacement of ASV between two sampling  
270 periods) and nestedness (gain or loss of ASV between two sampling periods [45]). We found  
271 that the dissimilarity between sampling periods was smaller for bacterial than for fungal ASV  
272 structure. By decomposing the dissimilarity between sampling periods, we found that, for  
273 fungi, 94% ( $\pm 5\%$ ) of dissimilarity was explained by turnover for oilseed rape, 89% ( $\pm 15\%$ )  
274 for wheat in monoculture, and 80% ( $\pm 13\%$ ) for wheat in rotation. For bacteria, 69% ( $\pm 17\%$ )  
275 of dissimilarity was explained by turnover for oilseed rape, 61% ( $\pm 19\%$ ) for wheat in  
276 monoculture, and 80% ( $\pm 16\%$ ) for wheat in rotation. Decomposition of dissimilarity between  
277 sampling periods is presented in Additional Table S7.

278

### 279 **Changes in communities, by genus**

280 We characterised potential taxonomic differences in communities over time by  
281 analysing wheat and oilseed rape residues separately. ASV were aggregated together at genus  
282 level, resulting in 84 fungal and 184 bacterial genera for wheat, and 63 fungal and 186  
283 bacterial genera for oilseed rape. For a sake of clarity, most 60 genera of fungi and bacteria  
284 were presented in Fig. 4 and Fig. 5, respectively. All the detected genera and their evolution  
285 over time were presented in Additional Fig. S1, S2, S3, S4. For both plant species, we



286 identified genera that disappeared or displayed a significant decrease in relative abundance  
287 over time. The seasonal shifts and their significance are presented in Additional Fig. S5.  
288 Among these genera, some are known to be associated with plants, such as *Alternaria*,  
289 *Acremonium* [14, 47, 48], *Cryptococcus* [49], *Sarocladium* [50] and *Cladosporium* [13, 47–  
290 50].

291 Some of the fungal species detected on wheat, such as *Oculimacula yallundae* (all  
292 ASV of *Oculimacula* genera), *Zymoseptoria tritici* and *Pyrenophora tritici-repentis*, (Fig. 4,  
293 Additional Fig. S1) are known to be pathogenic. Some of the species detected on oilseed rape,  
294 such as *Verticillium* spp., *Leptosphaeria maculans* (= *Plenodomus maculans*) and  
295 *Leptosphaeria biglobosa* (= *Plenodomus biglobosa*), are also known to be pathogenic.  
296 Strikingly, *L. maculans* and *L. biglobosa* predominated over the other taxa. *Verticillium*  
297 *longisporum*, *V. dahlia* and *V. albo-atrum* were mostly detected during the second sampling  
298 year (Fig. 4, Additional Fig. S2). As samples were collected in two different fields, it was not  
299 possible to determine whether the occurrence of *Verticillium* spp., a soil-borne pathogen  
300 complex causing *Verticillium* wilt [51], was affected more by year or by the soil  
301 contamination. *Acremonium*, *Clonostachys* and *Alternaria* genera, which have also been  
302 described as associated with plants [52], were detected in the early sampling periods. Their  
303 relative abundances decreased over time (Additional Fig. S5). Most of the genera that were  
304 not present at early sampling points and with relative abundances increasing over time (e.g.  
305 *Coprinellus*, *Psathyrella*, *Torula*, *Tetracladium*, and *Exophiala*) were common to wheat and  
306 oilseed rape residues (Fig. 4). These genera can thus be considered as probably derived  
307 primarily from the surrounding soil.

308 For bacteria, the difference in the genera detected between the two plants species was  
309 less marked than for fungi, as 146 genera were common to wheat and oilseed rape residues  
310 (Fig. 5). These 146 genera corresponded to the 98.7% most prevalent reads for wheat and

311 97.5% most prevalent genus reads for oilseed rape. *Proteobacteria* was the predominant  
312 phylum the first year. The most prevalent proteobacterial subgroup was *Alphaproteobacteria*,  
313 with a high prevalence of *Rhizobiales* and *Sphingomonadales*. *Rhizobium* and *Neorhizobium*,  
314 two major genera from *Rhizobiales*, decreased in abundance between October and May in  
315 both wheat and oilseed rape (Additional Fig. S5). *Sphingomonadales* genera were much more  
316 abundant on wheat than on oilseed rape, especially *Sphingomonas* (Fig. 5). *Bacteroidetes*  
317 genera, including *Pedobacter* in particular, were frequently detected and their prevalences  
318 tended to be stable for oilseed rape residues, and to decrease for wheat residues (Additional  
319 Fig. S5). In parallel, an increase in *Actinobacteria*, particularly *Nocarioides*, was observed  
320 (Additional Fig. S5). Major differences between July and October were observed for oilseed  
321 rape, consistent with the beta-diversity analysis, in which the percentage dissimilarity  
322 between July and October was high, due to both species extinction and turnover.  
323 *Gammaproteobacteria* were highly abundant on oilseed rape in July. Their frequency then  
324 decreased rapidly from October to May, due largely to the decrease in *Pseudomonas* (Fig 5,  
325 Additional Fig. S5). In parallel, we observed an increase in the levels of *Alphaproteobacteria*,  
326 especially *Rhizobium* and *Sphingomonas*, between July and October. A small decrease in  
327 levels of *Gammaproteobacteria* was observed between July and October for wheat in rotation,  
328 whereas the percentage of reads associated with this class increased between July and  
329 December for wheat in monoculture, due largely to the decrease in *Pantoea* and  
330 *Enterobacteria* (Fig 5, Additional Fig. S5). The abundance of *Bacteroidetes*, especially  
331 *Pedobacter* and *Flavobacterium*, also increased between July and October.

332

## 333 **Discussion**

334 Most studies on crop residues have focused on their impact on soil microbial  
335 communities [16], and the rare studies investigating the impact of soil on residue communities

336 focused exclusively on bacteria [27, 28] or fungi [53]. Most of these studies were conducted  
337 on residues from a single year. Bastian et al. [12] established an extensive description of the  
338 species present in the soil, detritosphere and wheat residues, using sterilised residues and soil  
339 in a microcosm. In this study, we showed, under natural conditions, that three main factors  
340 (plant species, cropping season, rotation) simultaneously influence the composition of both  
341 fungal and bacterial communities present on residues. This study is the first to investigate the  
342 total fungal and bacterial communities associated with wheat and oilseed rape residues by a  
343 metabarcoding approach over two consecutive years. The very low variability of the  
344 communities for the five replicates is remarkable and shows that our strategy would be  
345 appropriate for comparing the effects of different treatments on microbial communities.

346

347 **Crop residues should be viewed as a shifting platform for microbial meeting**  
348 **strongly affected by plant species**

349 Oilseed rape and wheat residues contained different sets of micro-organisms before  
350 soil contact and during the firsts sampling dates after harvest. Similar results were previously  
351 obtained for the bacterial communities of buried crop residues [28]. Consistent with the  
352 findings of this previous study, the divergence between wheat and oilseed rape bacterial  
353 communities was probably due to differences in the chemical compounds present in the  
354 plants. The rapid change in the community observed at early stages of residue degradation for  
355 oilseed rape may be explained by the modification of simple compounds (sugars, starch, etc.),  
356 whereas wheat is composed of more complex compounds (lignin) and is, therefore, broken  
357 down less quickly, resulting in a slower change in the microbial community [28]. Overall, the  
358 change in bacterial community composition highlights turnover between copiotrophs and  
359 oligotrophs. Although copiotrophy and oligotrophy are physiological traits, several attempts  
360 have been made to classify microorganisms as oligotrophs and copiotrophs based on

361 phylogeny [54]. According to this generalization, bacterial and fungal taxa whose relative  
362 abundances are significantly decreased during succession belong mainly to copiotroph. These  
363 taxa include for instance *Alternaria*, *Cladosporium*, *Massilia* and *Pseudomonas* (Additional  
364 file: Fig. S5). In contrast, the relative abundances of oligotrophic taxa such as *Coprinellus* or  
365 *Nocardiodes* increased during residues degradation, which could be indicative of the superior  
366 abilities of these micro-organisms to degrade complex polymers.

367         The initial fungal communities were structured mostly by the presence of species  
368 originating from the plant, several of which were highly specialised on the host plant. These  
369 species were gradually replaced by more generalist species, which colonised the residues of  
370 both plants. Most of these generalists, such as *Exophiala*, *Coprinellus* and *Torula*, are known  
371 to be soil-born [55, 56], or involved in degradation, such as *Copriopsis* [57]. The host-  
372 specific fungi identified in our study included a large number of ascomycetes known to be  
373 foliar pathogens (*O. yallundae*, *Fusarium* sp. and *Gibberella* sp., *Z. tritici*, *P. tritici-repentis*,  
374 *Parastagonospora nodorum*, *Monographella nivalis*, *L. biglobosa* and *L. maculans*). The  
375 lifestyles of some pathogens are well-documented, as for *Z. tritici*, *P. tritici-repentis* and *L.*  
376 *maculans*. The decrease with time in levels of *Z. tritici* and other pathogens in wheat residues  
377 contrasts with the persistence of *L. maculans* and *L. biglobosa* in oilseed rape residues. These  
378 three pathogens are all known to reproduce sexually on the residues of their host plant [31,  
379 58], but the life cycle of *L. maculans* is characterised by systemic host colonisation through  
380 intracellular growth in xylem vessels [59], whereas the development of *Z. tritici* is localised  
381 and exclusively extracellular [60]. Oilseed rape residues thus provide *L. maculans* with  
382 greater protection than is provided to *Z. tritici* by wheat residues. This likely explains  
383 differences in the persistence of the two pathogens and in the temporal dynamics of ascospore  
384 release: over up to two years for *L. maculans* [61, 62] but only a few months for *Z. tritici* [31,  
385 63]. The predominance of *L. maculans* on oilseed rape residues was not surprising given that

386 the oilseed rape cultivar Alpağa is known to be susceptible to *L. maculans*, but the high  
387 abundance of *L. biglobosa* was much more remarkable. One surprising finding of our study  
388 was the constant association of *L. maculans* with *L. biglobosa* on residues. Indeed, *L.*  
389 *biglobosa* is known to be more associated with upper-stem lesions [64], and its presence in  
390 large amounts on residues has never before been reported.

391 Our findings are consistent with current epidemiological knowledge of emblematic  
392 wheat and oilseed rape diseases, but they highlight our lack of knowledge concerning the  
393 lifestyles of many other fungal pathogens present on residues. A key point to be taken into  
394 account is that the trophic status of many species known to be principally pathogenic or non-  
395 pathogenic is not definitive [65]. For instance, *Alternaria infectoria* is sometimes described as  
396 a pathogen of wheat [13, 66], sometimes as an endophyte [67], and has even been tested as a  
397 potential biocontrol agent against *Fusarium pseudograminearum* on wheat [68]. Crop  
398 residues, half-plant/half-soil, should be the focus of future studies aiming to disentangle the  
399 succession of microbial species with different lifestyles and to characterise their relative  
400 impacts on the development of currently minor, but potentially threatening diseases.

401

402 **The residue microbiota should be analysed in a dynamic manner, both within and**  
403 **between years**

404 The results of our study highlight the importance of conducting multi-year studies  
405 focusing on ecological dynamics both within and between years in natural conditions. Year  
406 had a strong effect on both bacterial and fungal communities. Fluctuations of climatic  
407 conditions (temperature, rainfall, wind) have a major impact on pathogenesis (disease triangle  
408 concept [69]) and on the saprophytic survival of plant pathogens during interepidemic periods  
409 [70]. The two years of our study were marked by similar means of 10-day mean temperatures,  
410 but large differences in rainfall: mean 10-day cumulative rainfall in the first year was almost

411 twice that in the second (Additional table S4). The colonisation of residues by late colonisers  
412 may be affected by such climatic differences: in wheat, most prevalent degrading fungi (like  
413 *Coprinellus*, *Psathyrella*, *Coprinopsis*) were almost absent in the second year of the study.  
414 There was also considerable dissimilarity between the bacterial communities associated with  
415 each of the two years. For example, genus *Enterobacter*, which was highly abundant in the  
416 second year, was barely detectable in the first year.

417

### 418 **Crop rotation has little impact on residue microbial communities**

419 Oilseed rape is never grown in monoculture, so the effect of crop rotation was assessed  
420 only for wheat. The effect of rotation on residue microbial communities was much smaller  
421 than the effect of year (cropping season). It was more marked for fungi, for which diversity  
422 was greater in monoculture than in rotation. The use of a rotation may prevent the most  
423 strongly specialised species, in this case fungi, from becoming established, regardless of their  
424 pathogenicity. This finding is consistent with the greater development of some diseases in  
425 monoculture conditions, which promote the maintenance of pathogens through the local  
426 presence of primary inoculum. For instance, the presence of *P. tritici-repentis*, agent of tan  
427 spot disease, in the wheat monoculture plot and its absence from wheat-oilseed rape plots is  
428 consistent with epidemiological knowledge indicating that this disease can be controlled by  
429 leaving a sufficient interval between consecutive wheat crops in the same field [71].

430

### 431 **Lesson to be learned from the residue microbial communities for the sustainable** 432 **management of debris-borne diseases: a delicate balance between pathogenic and** 433 **beneficial micro-organisms**

434 The maintenance of crop residues at the surface of the cultivated soil increases the  
435 microbial diversity of the soil and, in some ways, helps to maintain good functional

436 homeostasis [72]. However, conservation practices tend to increase the risk of foliar diseases  
437 [4–6]. Most disease management strategies focus on epidemic periods, during which the  
438 pathogen and its host are in direct contact. Interepidemic periods are also crucial for pathogen  
439 development, although during these periods the primary inoculum is not directly in contact  
440 with the new crop whilst not present in the field. Indeed, by carrying the sexual reproduction  
441 of several fungal pathogens, residues contribute to the generation and transmission of new  
442 virulent isolates potentially overcoming resistance genes, during monocyclic epidemics, as  
443 described for oilseed rape canker caused by *L. maculans* [73], but also polycyclic epidemics,  
444 as described for Septoria tritici blotch caused by *Z. tritici* [74].

445         However, the results of our study suggest that residues should not only be considered as  
446 a substrate for pathogens and a potential source of inoculum. Indeed, we detected several  
447 fungi identified as beneficial or even biocontrol agents in previous studies, such as  
448 *Clonostachys rosea*, *Aureobasidium pullulans*, *Chaetomium globosum* and *Cryptococcus* spp.  
449 *C. rosea*, which was detected in both oilseed rape and wheat residues, has been reported to  
450 limit the sexual and asexual reproduction of *Didymella rabiei* on chickpea residues by  
451 mycoparasitism [75]. It has also been reported to be effective against *Fusarium culmorum* on  
452 wheat plants, through antibiosis during the epidemic period [76], and on wheat residues,  
453 through antagonism during the interepidemic period [77]. *Cladosporium* sp., which were  
454 abundant in our study, have also been reported to inhibit the development of *P. tritici-repentis*  
455 on wheat plants [78] and of *Fusarium* sp. on wheat residues [77]. The presence of these  
456 fungal species on wheat and oilseed rape residues is of potential interest for future analyses of  
457 interactions. Due to the use of a low-resolution marker for bacterial characterisation, we were  
458 unable to identify similarly the bacteria potentially interacting with pathogenic fungi. For  
459 instance, the presence of *Pseudomonas* spp. suggests possible interactions both with other  
460 microbial species and with the host plant [79], but the nature of the potential interactions is



461 indeterminate: species of the *Pseudomonas fluorescens* group are known to be beneficial to  
462 plants, whereas *Pseudomonas syringae* and *Pseudomonas aeruginosa* are known to be  
463 pathogens of plants and even humans.

464 Although our study reveals the presence of genera or species reported in the literature as  
465 biocontrol agents, it has not yet shown any interaction between them and the pathogens. This  
466 experimental study (sampling effort, residue treatments, etc.) was not designed to characterize  
467 such interactions. A strategy involving the inference of microbial interaction networks from  
468 metabarcoding datasets might help to identify the species beneficial against pathogens,  
469 through competition, antagonism or parasitism. This however requires a more analytical,  
470 comparative experimental approach, that goes beyond the only description of shifts in natural  
471 communities composition: for example, using different “treatments” in a broad sense (e.g.  
472 artificial inoculation with a species or a group of species, change of biotic or abiotic  
473 environmental conditions, etc.) in order to modify interaction networks and so highlight the  
474 impact of some groups of micro-organisms on the whole community or a given species.

475

## 476 **Conclusion**

477 This study shows that crop residues, which can be seen as half-plant/half-soil transient  
478 compartment, constitute a pivotal fully-fledged microbial ecosystem that has received much  
479 less attention than the phyllosphere and rhizosphere to date. This study therefore fills a gap in  
480 knowledge of the communities present on crop residues under natural conditions. It confirms  
481 that the microbiote of crop residues should be taken into account in the management of  
482 residue-borne diseases. Taking into account this ecosystem is essential, not only to improve  
483 the quantitative management of crop residues, but also to identify groups of beneficial micro-  
484 organisms naturally present. The beneficial elements of the microbial community should be  
485 preserved, or even selected, characterised and used as biological control agents against the



486 pathogens that complete their life cycle on the residues. These results are particularly  
487 important in that wheat-oilseed rape rotations are among the most widespread arable cropping  
488 systems in France and Europe.

489

## 490 **Acknowledgements**

491 This study was performed in collaboration with the GeT core facility, Toulouse, France  
492 (<http://get.genotoul.fr>) and was supported by *France Génomique National Infrastructure*,  
493 funded as part of “*Investissement d’avenir*” program managed by *Agence Nationale pour la*  
494 *Recherche* (contract ANR-10-INBS-09). We thank Martial Briand (INRA, UMR IRHS) and  
495 Dr. Gautier Richard (INRA, UMR IGEPP) for assistance with bioinformatic analyses, and Dr.  
496 Thierry Rouxel (INRA, UMR BIOGER) for improving and clarifying this manuscript. We  
497 thank Julie Sappa for her help correcting our English.

498

## 499 **Funding**

500 This study was supported by a grant from the European Union Horizon Framework 2020  
501 Program (EMPHASIS Project, Grant Agreement no. 634179) covering the 2015-2019 period.

502

## 503 **Availability of data and materials**

504 The raw sequencing data is available from the European Nucleotide Archive (ENA) under the  
505 study accession PRJEB27255 (Sample SAMEA4723701 to SAMEA4724326). We provide  
506 the command-line script for data analysis and all necessary input files as Additional File 2.

507

## 508 **Authors’ contributions**

509 LK, FS, VL, MHB, MB conceived the study, participated in its design, and wrote the  
510 manuscript. LK conducted the experiments and analysed the data. FS and VL supervised the  
511 project. All authors read and approved the final manuscript.

512

### 513 **Ethics approval and consent to participate**

514 Not applicable

515

### 516 **Consent for publication**

517 Not applicable

518

### 519 **Competing interests**

520 The authors declare that they have no competing interests.

521

### 522 **References**

- 523 1. Smil, V. (1999). Crop residues: agriculture's largest harvest crop residues incorporate  
524 more than half of the world's agricultural phytomass. *BioScience* 49, 299–308.
- 525 2. Govaerts, B., Mezzalama, M., Unno, Y., Sayre, K.D., Luna-Guido, M., Vanherck, K.,  
526 Dendooven, L., and Deckers, J. (2007). Influence of tillage, residue management, and  
527 crop rotation on soil microbial biomass and catabolic diversity. *Appl. Soil Ecol.* 37, 18–  
528 30.
- 529 3. Derpsch, R., Friedrich, T., Kassam, A., and Hongwen, L. (2010). Current status of  
530 adoption of no-till farming in the world and some of its main benefits. *Biol Eng* 3, 25.
- 531 4. Bailey, K.L. (1996). Diseases under conservation tillage systems. *Can. J. Plant Sci.* 76,  
532 635–639.

- 533 5. Bailey, K., and Lazarovits, G. (2003). Suppressing soil-borne diseases with residue  
534 management and organic amendments. *Soil Tillage Res.* 72, 169–180.
- 535 6. Bockus, W.W., and Shroyer, J.P. (1998). The impact of reduced tillage on soilborne  
536 plant pathogens. *Annu. Rev. Phytopathol.* 36, 485–500.
- 537 7. Bockus, W.W. (1998). Control strategies for stubble-borne pathogens of wheat. *Can. J.*  
538 *Plant Pathol.* 20, 371–375.
- 539 8. Cook, R.J., Boosalis, M.G., and Doupnik, B. (1978). Influence of crop residues on plant  
540 diseases. *Crop Residue Manag. Syst.* 147–163.
- 541 9. Morais, D., Sache, I., Suffert, F., and Laval, V. (2016). Is the onset of *Septoria tritici*  
542 blotch epidemics related to the local pool of ascospores? *Plant Pathol.* 65, 250–260.
- 543 10. Vayssier-Taussat, M., Albina, E., Citti, C., Cosson, J.-F., Jacques, M.-A., Lebrun, M.-  
544 H., Le Loir, Y., Ogliastro, M., Petit, M.-A., Roumagnac, P., et al. (2014). Shifting the  
545 paradigm from pathogens to pathobiome: new concepts in the light of meta-omics.  
546 *Front. Cell. Infect. Microbiol.* 4.
- 547 11. Hadas, A., Kautsky, L., Goek, M., and Erman Kara, E. (2004). Rates of decomposition  
548 of plant residues and available nitrogen in soil, related to residue composition through  
549 simulation of carbon and nitrogen turnover. *Soil Biol. Biochem.* 36, 255–266.
- 550 12. Bastian, F., Bouziri, L., Nicolardot, B., and Ranjard, L. (2009). Impact of wheat straw  
551 decomposition on successional patterns of soil microbial community structure. *Soil*  
552 *Biol. Biochem.* 41, 262–275.
- 553 13. Hertz, M., Jensen, I.R., Jensen, L.Ø., Thomsen, S.N., Winde, J., Dueholm, M.S.,  
554 Sørensen, L.H., Wollenberg, R.D., Sørensen, H.O., Sondergaard, T.E., et al. (2016). The  
555 fungal community changes over time in developing wheat heads. *Int. J. Food Microbiol.*  
556 222, 30–39.

- 557 14. Qin, Y., Fu, Y., Dong, C., Jia, N., and Liu, H. (2016). Shifts of microbial communities  
558 of wheat (*Triticum aestivum* L.) cultivation in a closed artificial ecosystem. Appl.  
559 Microbiol. Biotechnol. *100*, 4085–4095.
- 560 15. Vacher, C., Hampe, A., Porté, A.J., Sauer, U., Compant, S., and Morris, C.E. (2016).  
561 The phyllosphere: microbial jungle at the plant–climate interface. Annu. Rev. Ecol.  
562 Evol. Syst. *47*, 1–24.
- 563 16. Bending, G.D., Turner, M.K., and Jones, J.E. (2002). Interactions between crop residue  
564 and soil organic matter quality and the functional diversity of soil microbial  
565 communities. Soil Biol. Biochem. *34*, 1073–1082.
- 566 17. Degrune, F., Theodorakopoulos, N., Dufrêne, M., Colinet, G., Bodson, B., Hiel, M.-P.,  
567 Taminiau, B., Nezer, C., Daube, G., and Vandenberg, M. (2016). No favorable effect of  
568 reduced tillage on microbial community diversity in a silty loam soil (Belgium). Agric.  
569 Ecosyst. Environ. *224*, 12–21.
- 570 18. Sommermann, L., Geistlinger, J., Wibberg, D., Deubel, A., Zwanzig, J., Babin, D.,  
571 Schlüter, A., and Schellenberg, I. (2018). Fungal community profiles in agricultural  
572 soils of a long-term field trial under different tillage, fertilization and crop rotation  
573 conditions analyzed by high-throughput ITS-amplicon sequencing. PLoS ONE *13*,  
574 e0195345.
- 575 19. Zelenev, V.V., van Bruggen, A.H.C., and Semenov, A.M. (2005). Short-term wavelike  
576 dynamics of bacterial populations in response to nutrient input from fresh plant  
577 residues. Microb. Ecol. *49*, 83–93.
- 578 20. Poll, C., Brune, T., Begerow, D., and Kandeler, E. (2010). Small-scale diversity and  
579 succession of fungi in the detritosphere of rye residues. Microb. Ecol. *59*, 130–140.

- 580 21. Poll, C., Marhan, S., Ingwersen, J., and Kandeler, E. (2008). Dynamics of litter carbon  
581 turnover and microbial abundance in a rye detritosphere. *Soil Biol. Biochem.* *40*, 1306–  
582 1321.
- 583 22. Kuzyakov, Y., and Blagodatskaya, E. (2015). Microbial hotspots and hot moments in  
584 soil: Concept & review. *Soil Biol. Biochem.* *83*, 184–199.
- 585 23. Nicolardot, B., Bouziri, L., Bastian, F., and Ranjard, L. (2007). A microcosm  
586 experiment to evaluate the influence of location and quality of plant residues on residue  
587 decomposition and genetic structure of soil microbial communities. *Soil Biol. Biochem.*  
588 *39*, 1631–1644.
- 589 24. Hilton, S., Bennett, A.J., Chandler, D., Mills, P., and Bending, G.D. (2018). Preceding  
590 crop and seasonal effects influence fungal, bacterial and nematode diversity in wheat  
591 and oilseed rape rhizosphere and soil. *Appl. Soil Ecol.*
- 592 25. AGRESTE, 2018. Données de production Grandes Cultures (national + régions) au  
593 01/02/2018. Excel file,  
594 [http://agreste.agriculture.gouv.fr/IMG/xls/2018\\_017donneesdeptgrandescultures.xls](http://agreste.agriculture.gouv.fr/IMG/xls/2018_017donneesdeptgrandescultures.xls)
- 595 26. AGRESTE, 2008. Un tiers des grandes cultures semées en 2006 sans retournement des  
596 sols. Dans le sillon du non-labour. Agreste Primeur, n°207,  
597 <http://agreste.agriculture.gouv.fr/IMG/pdf/primeur207.pdf>
- 598 27. Pascault, N., Nicolardot, B., Bastian, F., Thiébeau, P., Ranjard, L., and Maron, P.-A.  
599 (2010a). *In situ* dynamics and spatial heterogeneity of soil bacterial communities under  
600 different crop residue management. *Microb. Ecol.* *60*, 291–303.
- 601 28. Pascault, N., Cécillon, L., Mathieu, O., Hénault, C., Sarr, A., Lévêque, J., Farcy, P.,  
602 Ranjard, L., and Maron, P.-A. (2010b). *In situ* dynamics of microbial communities  
603 during decomposition of wheat, rape, and alfalfa residues. *Microb. Ecol.* *60*, 816–828.

- 604 29. Hanson, B.M., and Weinstock, G.M. (2016). The importance of the microbiome in  
605 epidemiologic research. *Ann. Epidemiol.* *26*, 301–305.
- 606 30. Costa Junior, C., Corbeels, M., Bernoux, M., Píccolo, M.C., Siqueira Neto, M., Feigl,  
607 B.J., Cerri, C.E.P., Cerri, C.C., Scopel, E., and Lal, R. (2013). Assessing soil carbon  
608 storage rates under no-tillage: Comparing the synchronic and diachronic approaches.  
609 *Soil Tillage Res.* *134*, 207–212.
- 610 31. Suffert, F., and Satche, I. (2011). Relative importance of different types of inoculum to  
611 the establishment of *Mycosphaerella graminicola* in wheat crops in north-west Europe:  
612 Wheat debris as local source of *M. graminicola* inoculum. *Plant Pathol.* *60*, 878–889.
- 613 32. Morais, D., Laval, V., Satche, I., and Suffert, F. (2015). Comparative pathogenicity of  
614 sexual and asexual spores of *Zymoseptoria tritici* (*Septoria tritici* blotch) on wheat  
615 leaves. *Plant Pathol.* *64*, 1429–1439.
- 616 33. Suffert, F., Goyeau, H., Satche, I., Carpentier, F., Gélisse, S., Morais, D., Delestre G.  
617 (2017) Epidemiological trade-off between intra- and interannual scales in the evolution  
618 of aggressiveness in a local plant pathogen population. *Evol. Appl.* *11*, 768–780.
- 619 34. Buée, M., Reich, M., Murat, C., Morin, E., Nilsson, R.H., Uroz, S., and Martin, F.  
620 (2009). 454 Pyrosequencing analyses of forest soils reveal an unexpectedly high fungal  
621 diversity: Research. *New Phytol.* *184*, 449–456.
- 622 35. Caporaso, J.G., Lauber, C.L., Walters, W.A., Berg-Lyons, D., Lozupone, C.A.,  
623 Turnbaugh, P.J., Fierer, N., and Knight, R. (2011). Global patterns of 16S rRNA  
624 diversity at a depth of millions of sequences per sample. *Proc. Natl. Acad. Sci. USA*  
625 *108*, 4516–4522.
- 626 36. Callahan, B.J., McMurdie, P.J., Rosen, M.J., Han, A.W., Johnson, A.J.A., and Holmes,  
627 S.P. (2016). DADA2: High-resolution sample inference from Illumina amplicon data.  
628 *Nat. Methods* *13*, 581–583.

- 629 37. DADA2 Pipeline Tutorial (1.8). Available at:  
630 <https://benjjneb.github.io/dada2/tutorial.html>. (Accessed: 26th June 2018)
- 631 38. Cole, J.R., Wang, Q., Cardenas, E., Fish, J., Chai, B., Farris, R.J., Kulam-Syed-  
632 Mohideen, A.S., McGarrell, D.M., Marsh, T., Garrity, G.M., et al. (2009). The  
633 Ribosomal Database Project: improved alignments and new tools for rRNA analysis.  
634 *Nucleic Acids Res.* 37, D141–D145.
- 635 39. Abarenkov, K., Nilsson, R.H., Larsson, K.-H., Alexander, I.J., Eberhardt, U., Erland, S.,  
636 Høiland, K., Kjølner, R., Larsson, E., Pennanen, T., et al. (2010). The UNITE database  
637 for molecular identification of fungi – recent updates and future perspectives. *New*  
638 *Phytol.* 186, 281–285.
- 639 40. Ficetola, G.F., Pansu, J., Bonin, A., Coissac, E., Giguët-Covex, C., De Barba, M.,  
640 Gielly, L., Lopes, C.M., Boyer, F., Pompanon, F., et al. (2015). Replication levels, false  
641 presences and the estimation of the presence/absence from eDNA metabarcoding data.  
642 *Mol. Ecol. Resour.* 15, 543–556.
- 643 41. McMurdie, P.J., and Holmes, S. (2014). Waste not, want not: why rarefying  
644 microbiome data is inadmissible. *PLoS Comput Biol* 10, e1003531.
- 645 42. Kassambara, A. (2017). ggpubr: “ggplot2” Based Publication Ready Plots.
- 646 43. McMurdie, P.J., and Holmes, S. (2013). phyloseq: An R package for reproducible  
647 interactive analysis and graphics of microbiome census data. *PLoS ONE* 8, e61217.
- 648 44. Oksanen, J., Blanchet, F.G., Friendly, M., Kindt, R., Legendre, P., McGlinn, D.,  
649 Minchin, P.R., O’Hara, R.B., Simpson, G.L., Solymos, P., et al. (2017). vegan:  
650 Community Ecology Package. R package version 2.4-4. [https://CRAN.R-](https://CRAN.R-project.org/package=vegan)  
651 [project.org/package=vegan](https://CRAN.R-project.org/package=vegan).
- 652 45. Baselga, A., and Orme, C.D.L. (2012). betapart: an R package for the study of beta  
653 diversity. *Methods Ecol. Evol.* 3, 808–812.

- 654 46. Letunic, I., and Bork, P. (2016). Interactive tree of life (iTOL) v3: an online tool for the  
655 display and annotation of phylogenetic and other trees. *Nucleic Acids Res.* *44*, W242–  
656 W245.
- 657 47. Bateman, G.L., and Kwaśna, H. (1999). Effects of number of winter wheat crops grown  
658 successively on fungal communities on wheat roots. *Appl. Soil Ecol.* *13*, 271–282.
- 659 48. Vujanovic, V., Mavragani, D., and Hamel, C. (2012). Fungal communities associated  
660 with durum wheat production system: A characterization by growth stage, plant organ  
661 and preceding crop. *Crop Prot.* *37*, 26–34.
- 662 49. Larran, S., Perelló, A., Simón, M.R., and Moreno, V. (2002). Isolation and analysis of  
663 endophytic microorganisms in wheat (*Triticum aestivum* L.) leaves. *World J. Microbiol.*  
664 *Biotechnol.* *18*, 683–686.
- 665 50. Grudzinska-Sterno, M., Yuen, J., Stenlid, J., and Djurle, A. (2016). Fungal communities  
666 in organically grown winter wheat affected by plant organ and development stage. *Eur.*  
667 *J. Plant Pathol.* *146*, 401–417.
- 668 51. Zhou, L., Hu, Q., Johansson, A., and Dixelius, C. (2006). *Verticillium longisporum* and  
669 *V. dahliae*: infection and disease in *Brassica napus*. *Plant Pathol.* *55*, 137–144.
- 670 52. Zhang, Q., Zhang, J., Yang, L., Zhang, L., Jiang, D., Chen, W., and Li, G. (2014).  
671 Diversity and biocontrol potential of endophytic fungi in *Brassica napus*. *Biol. Control*  
672 *72*, 98–108.
- 673 53. Naseri, B., Davidson, J.A., and Scott, E.S. (2008). Survival of *Leptosphaeria maculans*  
674 and associated mycobiota on oilseed rape stubble buried in soil. *Plant Pathol.* *57*, 280–  
675 289.
- 676 54. Ho, A., Di Lonardo, D.P., and Bodelier, P.L.E. (2017). Revisiting life strategy concepts  
677 in environmental microbial ecology. *FEMS Microbiol Ecol.* *93*,  
678 doi:10.1093/femsec/fix006.



- 679 55. Gorfer, M., Blumhoff, M., Klaubauf, S., Urban, A., Inselsbacher, E., Bandian, D.,  
680 Mitter, B., Sessitsch, A., Wanek, W., and Strauss, J. (2011). Community profiling and  
681 gene expression of fungal assimilatory nitrate reductases in agricultural soil. *ISME J.* 5,  
682 1771–1783.
- 683 56. Swer, H., Dkhar, M.S., and Kayang, H. (2011). Fungal population and diversity in  
684 organically amended agricultural soils of Meghalaya, India. *J. Org. Syst.* 6, 3–12.
- 685 57. Turbe-Doan, A., Arfi, Y., Record, E., Estrada-Alvarado, I., and Levasseur, A. (2013).  
686 Heterologous production of cellobiose dehydrogenases from the basidiomycete  
687 *Coprinopsis cinerea* and the ascomycete *Podospora anserina* and their effect on  
688 saccharification of wheat straw. *Appl. Microbiol. Biotechnol.* 97, 4873–4885.
- 689 58. Rouxel, T., and Balesdent, M.H. (2005). The stem canker (blackleg) fungus,  
690 *Leptosphaeria maculans*, enters the genomic era. *Mol. Plant Pathol.* 6, 225–241.
- 691 59. Hammond, K.E., Lewis, B.G., and Musa, T.M. (1985). A systemic pathway in the  
692 infection of oilseed rape plants by *Leptosphaeria maculans*. *Plant Pathol.* 34, 557–565.
- 693 60. Ponomarenko A., S.B. Goodwin, and G.H.J. Kema. 2011. Septoria tritici blotch (STB)  
694 of wheat. *Plant Health Instructor*. DOI:10.1094/PHI-I-2011-0407-01
- 695 61. Hershman, D.E. (1995). Etiology of canola blackleg in Kentucky and seasonal  
696 discharge patterns of *Leptosphaeria maculans* ascospores from infested canola stubble.  
697 *Plant Dis.* v. 79, 1225–1229.
- 698 62. Petrie, G.A. (Agriculture and A.-F.C. (1995). Patterns of ascospore discharge by  
699 *Leptosphaeria maculans* (blackleg) from 9- to 13-month-old naturally-infected  
700 rapeseed/canola stubble from 1977 to 1993 in Saskatchewan. *Can. Plant Dis. Surv. Can.*
- 701 63. Eyal, Z., Scharen, A.L., Prescott, J.M., and Ginkel, M.V. (1987). The septoria diseases  
702 of wheat : concepts and methods of disease management (CIMMYT).

- 703 64. Fitt, B.D.L., Brun, H., Barbetti, M.J., and Rimmer, S.R. (2006). World-wide importance  
704 of phoma stem canker (*Leptosphaeria maculans* and *L. biglobosa*) on oilseed rape  
705 (*Brassica napus*). *Eur. J. Plant Pathol.* *114*, 3–15.
- 706 65. Fesel, P.H., and Zuccaro, A. (2016). Dissecting endophytic lifestyle along the  
707 parasitism/mutualism continuum in *Arabidopsis*. *Curr. Opin. Microbiol.* *32*, 103–112.
- 708 66. Nicolaisen, M., Justesen, A.F., Knorr, K., Wang, J., and Pinnschmidt, H.O. (2014).  
709 Fungal communities in wheat grain show significant co-existence patterns among  
710 species. *Fungal Ecol.* *11*, 145–153.
- 711 67. Larran, S., Perelló, A., Simón, M.R., and Moreno, V. (2007). The endophytic fungi  
712 from wheat (*Triticum aestivum* L.). *World J. Microbiol. Biotechnol.* *23*, 565–572.
- 713 68. Lakhesar, D.P.S., Backhouse, D., and Kristiansen, P. (2010). Nutritional constraints on  
714 displacement of *Fusarium pseudograminearum* from cereal straw by antagonists. *Biol.*  
715 *Control* *55*, 241–247.
- 716 69. Brader, G., Compant, S., Vescio, K., Mitter, B., Trognitz, F., Ma, L.-J., and Sessitsch,  
717 A. (2017). Ecology and genomic insights into plant-pathogenic and plant-nonpathogenic  
718 endophytes. *Annu. Rev. Phytopathol.* *55*, 61–83.
- 719 70. Leplat, J., Friberg, H., Abid, M., and Steinberg, C. (2013). Survival of *Fusarium*  
720 *graminearum*, the causal agent of *Fusarium* head blight. A review. *Agron. Sustain. Dev.*  
721 *33*, 97–111.
- 722 71. Bockus, W.W., and Claassen, M.M. (1992). Effects of crop rotation and residue  
723 management practices on severity of tan spot of winter wheat. *Plant Dis.* *76*, 633–636.
- 724 72. Van Bruggen, A.H.C., and Semenov, A.M. (2000). In search of biological indicators for  
725 soil health and disease suppression. *Appl. Soil Ecol.* *15*, 13–24.
- 726 73. Daverdin, G., Rouxel, T., Gout, L., Aubertot, J.-N., Fudal, I., Meyer, M., Parlange, F.,  
727 Carpezat, J., and Balesdent, M.-H. (2012). Genome structure and reproductive

- 728 behaviour influence the evolutionary potential of a fungal phytopathogen. PLoS Pathog.  
729 8, e1003020.
- 730 74. Kema, G.H.J., Mirzadi Gohari, A., Aouini, L., Gibriel, H.A.Y., Ware, S.B., van den  
731 Bosch, F., Manning-Smith, R., Alonso-Chavez, V., Helps, J., Ben M'Barek, S., et al.  
732 (2018). Stress and sexual reproduction affect the dynamics of the wheat pathogen  
733 effector AvrStb6 and strobilurin resistance. Nat. Genet. 50, 375–380.
- 734 75. Dugan, F.M., Lupien, S.L., Hernandez-Bello, M., Peever, T.L., and Chen, W. (2005).  
735 Fungi resident in chickpea debris and their suppression of growth and reproduction of  
736 *Didymella rabiei* under laboratory conditions. J. Phytopathol. 153, 431–439.
- 737 76. Hue, A.G., Voldeng, H.D., Savard, M.E., Fedak, G., Tian, X., and Hsiang, T. (2009).  
738 Biological control of fusarium head blight of wheat with *Clonostachys rosea* strain  
739 ACM941. Can. J. Plant Pathol. 31, 169–179.
- 740 77. Luongo, L., Galli, M., Corazza, L., Meekes, E., Haas, L.D., Van Der Plas, C.L., and  
741 Köhl, J. (2005). Potential of fungal antagonists for biocontrol of *Fusarium spp.* in wheat  
742 and maize through competition in crop debris. Biocontrol Sci. Technol. 15, 229–242.
- 743 78. Li, B.C., and Sutton, J.C. (1995). Evaluation of leaf-associated microorganisms for  
744 biocontrol of tan spot in wheat foliage. Fitopatol. Bras. 20, 545–552.
- 745 79. Silby, M.W., Winstanley, C., Godfrey, S.A.C., Levy, S.B., and Jackson, R.W. (2011).  
746 *Pseudomonas* genomes: diverse and adaptable. FEMS Microbiol. Rev. 35, 652–680.

747

## 748 **Figure captions**

749

750 **Figure 1** - Experimental layout of the experiment. (A) Plots (WWW, WOW and OWO) used  
751 during the two years of the experiment at the INRA Grignon experimental station (Yvelines,  
752 France). WWW: plot cropped with winter wheat since 2007. WOW and OWO: plots cropped

753 with a wheat-oilseed rape rotation since 2014. Wheat straw and oilseed rape debris were  
754 chopped at harvest and left on the soil surface. The dashed line indicates the sampling  
755 transect. **(B)** Oilseed rape residues in a plot cropped with wheat (OWO or WOW). **(C)** Wheat  
756 residues in a plot cropped with oilseed rape (WOW or OWO). **(D)** Wheat residues in the  
757 wheat monoculture crop (WWW).

758 **Figure 2** - Fungal **(A)** and bacterial **(B)** diversity in plants (July) and residues (October,  
759 December, February, May), as assessed with the Shannon index, according to sampling  
760 period, the crop within a rotation (oilseed rape in OWO or WOW, wheat in WWW, wheat in  
761 WOW or OWO) and the cropping season (2015-2016, 2016-2017). Each box represents the  
762 distribution of Shannon index for five sampling points. Kruskal-Wallis tests were performed  
763 for each “crop within a rotation \* cropping season” combination (*p*-values are given under  
764 each graph). Wilcoxon tests between sampling periods were performed when the Kruskal-  
765 Wallis test revealed significant differences. Samples not sharing letters are significantly  
766 different.

767 **Figure 3** - Structure of the fungal **(A)** and bacterial **(B)** communities present in oilseed rape  
768 and wheat residues, according to compositional dissimilarity (Bray-Curtis distance), after  
769 multidimensional scaling (MDS). The two MDS were performed on the overall dataset and  
770 faceted according to the sampling period. Each point represents one sample corresponding to  
771 a cropping season (shape: 2015-2016; 2016-2017; 2017-2018) and crop within a rotation  
772 (colour: oilseed rape in rotation, i.e. in WOW and OWO; wheat monoculture, i.e. in WWW;  
773 wheat in rotation, i.e. in WOW and OWO).

774 **Figure 4** – Distribution of the 60 most prevalent fungal genera detected in wheat residues in  
775 the five samples for each sampling date. Unclassified genera were removed from the  
776 visualisation.

777 **Figure 5** – Distribution of the 60 most prevalent bacterial genera detected in wheat residues in  
778 the five samples for each sampling date. Unclassified genera were removed from the  
779 visualisation.

780 **Table 1** - Results of the PERMANOVA test analysing the effects of plant, rotation, cropping  
781 season, and sampling period on the fungal and bacterial communities present in oilseed rape  
782 and wheat residues.

783 **Additional files**

784

785 **List of supplementary figures:**

786 **Figure S1** - Distribution of the most prevalent fungal genera detected in wheat residues.

787 **Figure S2** - Distribution of the most prevalent fungal genera detected in oilseed rape residues.

788 **Figure S3** - Distribution of the most prevalent bacterial genera detected in wheat residues.

789 **Figure S4** - Distribution of the most prevalent bacterial genera detected in oilseed rape residues.

790 **Figure S5** - Seasonal shift in the relative abundance of a selection of fungal and bacterial  
791 genera present on wheat and oilseed rape residues.

792

793 **List of supplementary tables:**

794 **Table S1** - Soil texture of the three plots.

795 **Table S2** - Sampling dates of wheat and oilseed rape plants (July) and residues (October,  
796 December, February and May) for each cropping season.

797 **Table S3** - Total number of reads and percentage (in brackets) remaining after ASV filtering.

798 **Table S4** - Summary of meteorological data (temperature, rainfall) for the INRA Grignon  
799 experimental station (Yvelines, France).

800 **Table S5** - *P*-values from Wilcoxon pairwise test comparisons for bacterial and fungal  
801 diversity.

802 **Table S6** - Plant effect (wheat vs. oilseed rape) on community dispersion.

803 **Table S7** - Decomposition of dissimilarity due to temporal changes in fungal (F) and bacterial  
804 (B) community.



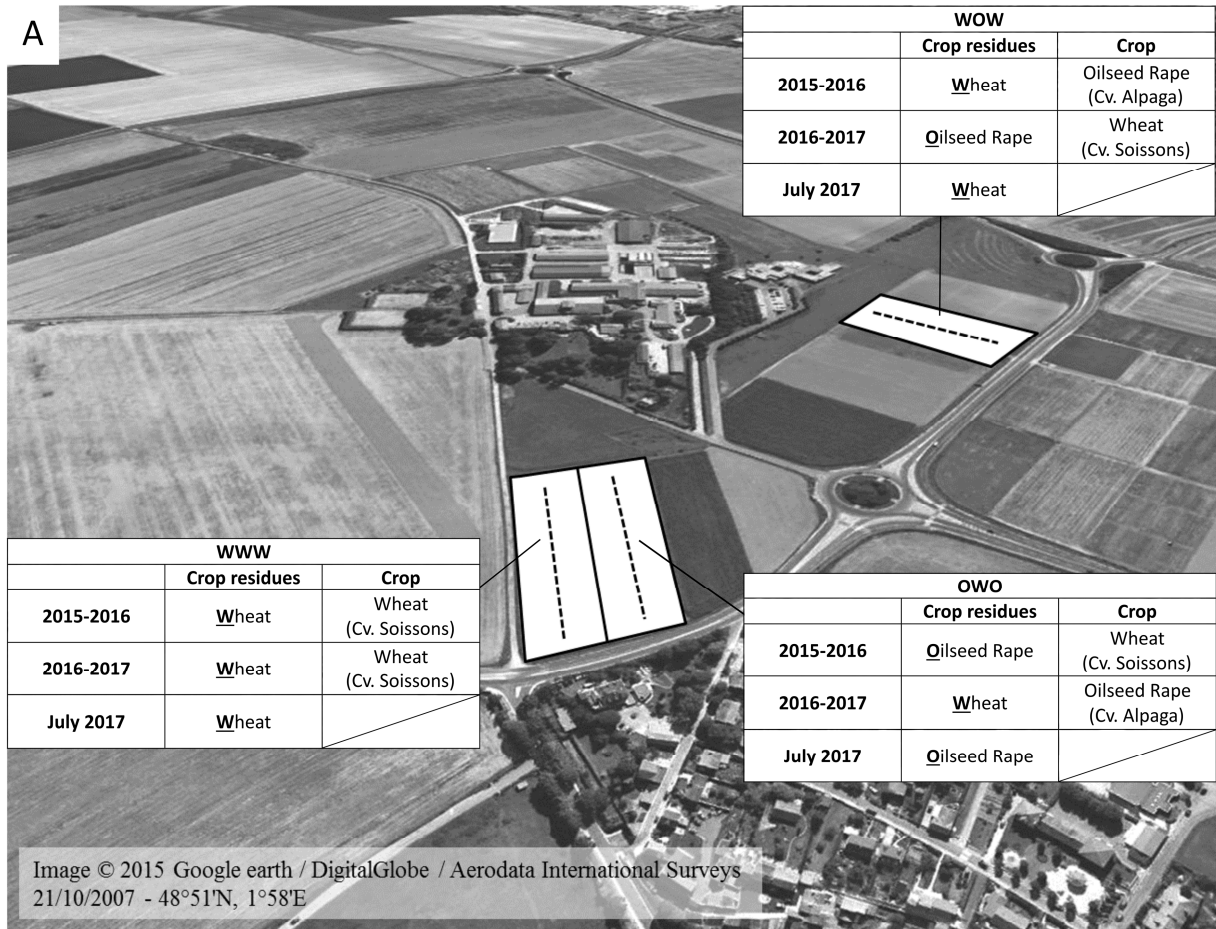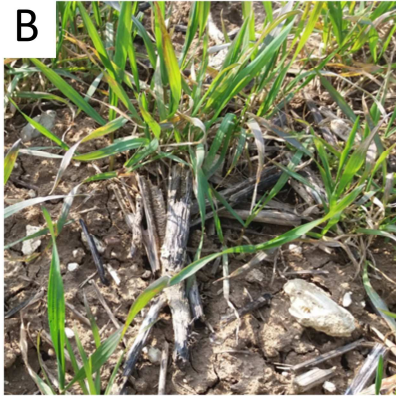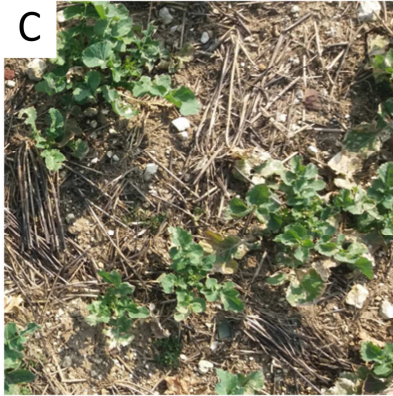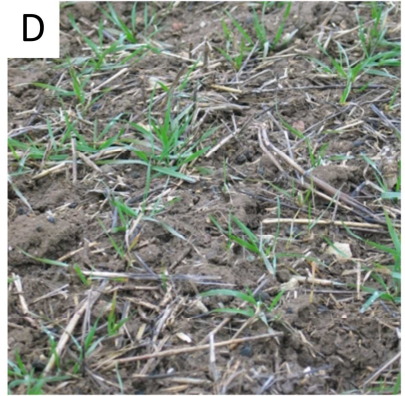

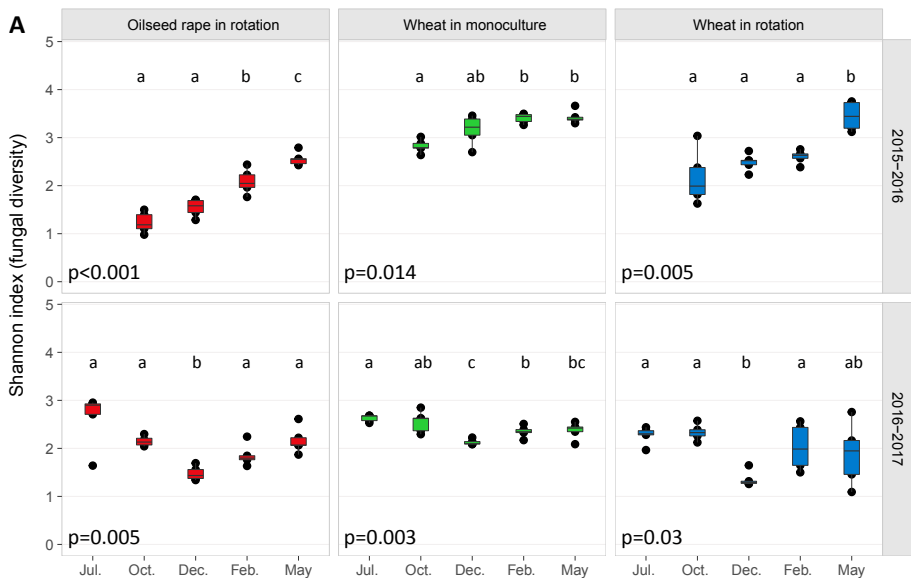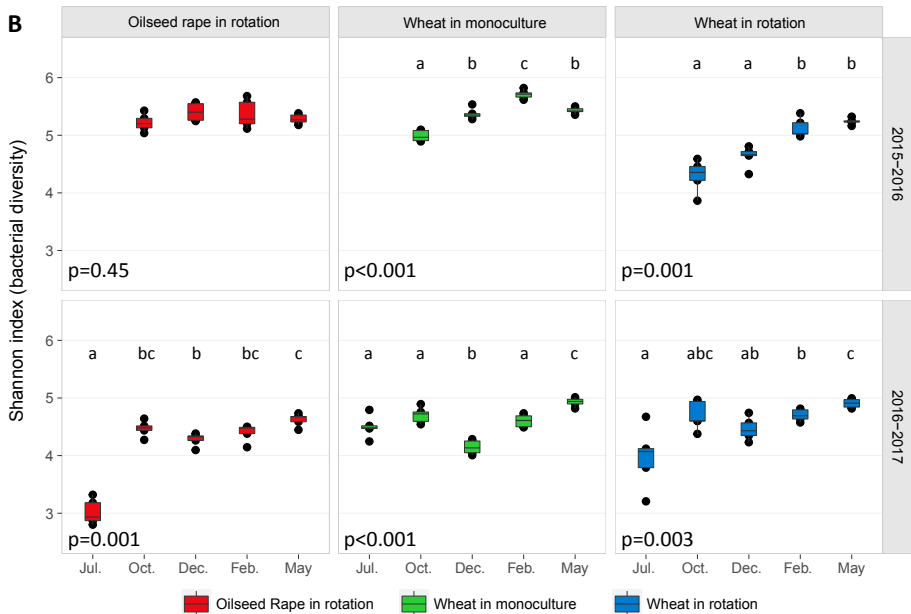



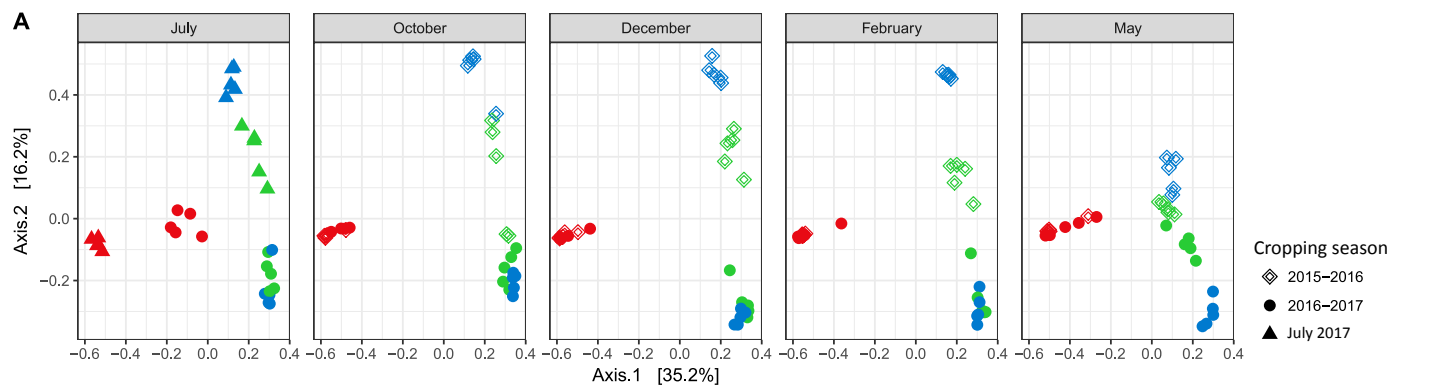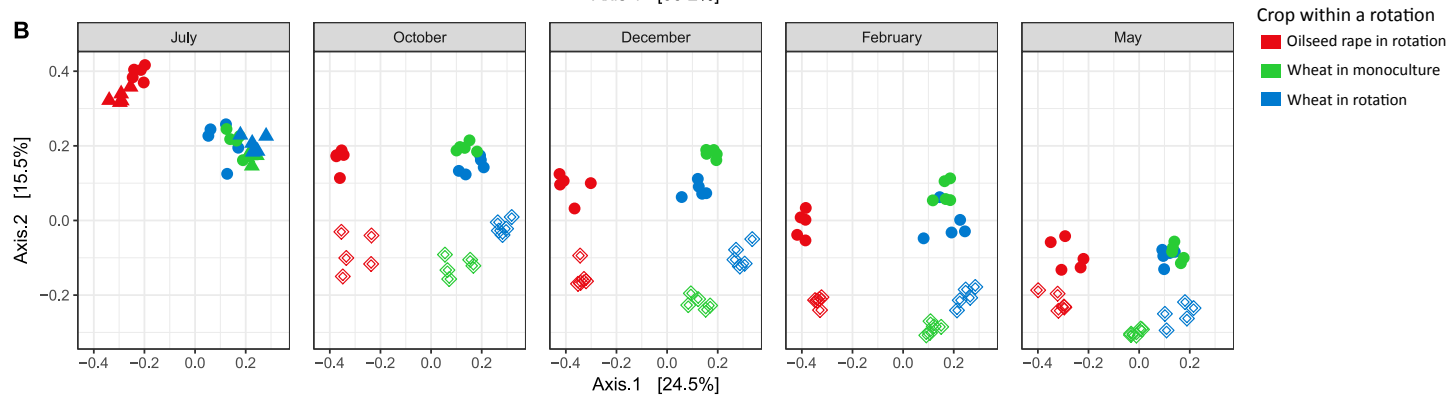

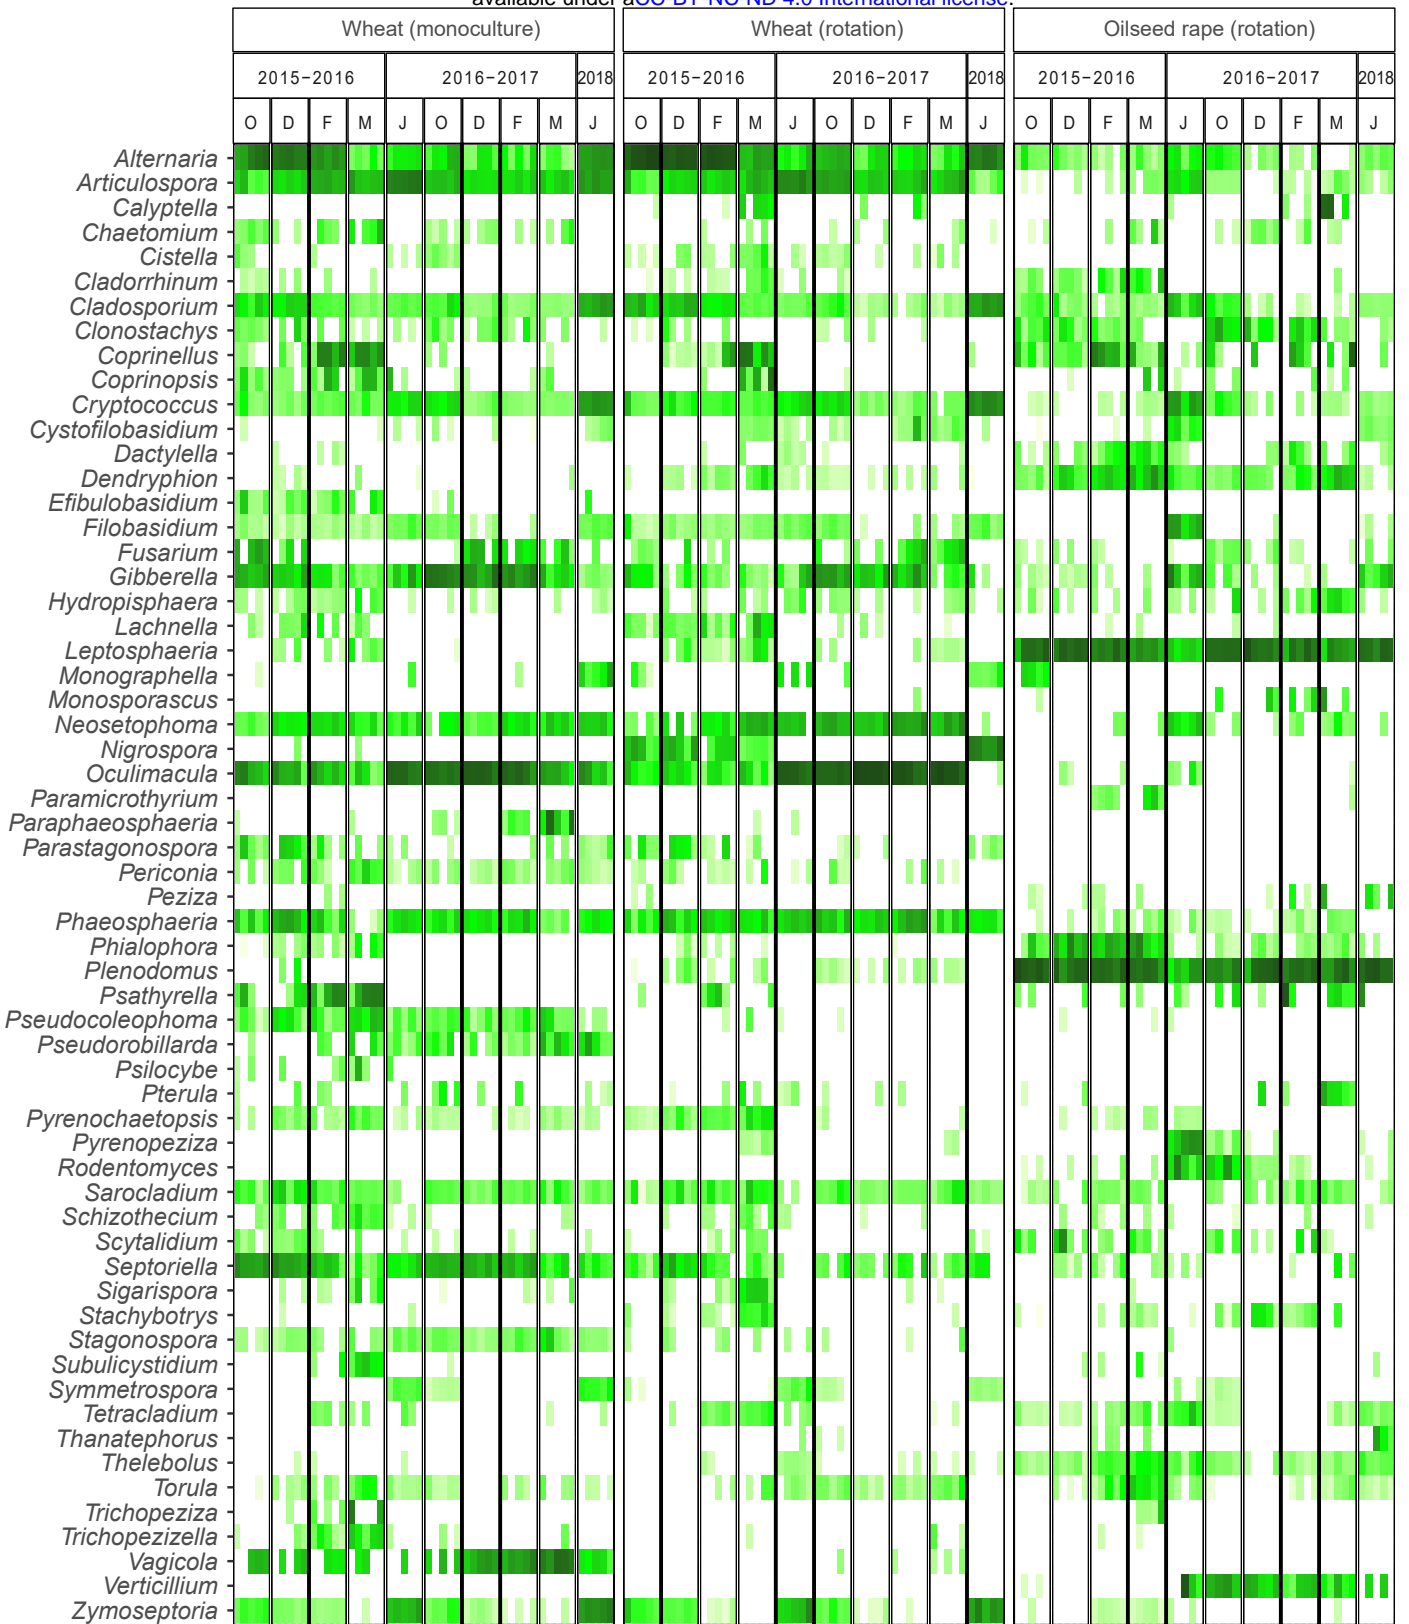

Reads number

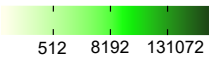

J : July

O : October

D : December

F : February

M : May



**Table 1** - Results of the PERMANOVA test analysing the effects of plant, rotation, cropping season, and sampling period on the fungal and bacterial communities present in oilseed rape and wheat residues

| Data set          | Factors                | Fungi          |                 | Bacteria       |                 |
|-------------------|------------------------|----------------|-----------------|----------------|-----------------|
|                   |                        | R <sup>2</sup> | <i>p</i> -value | R <sup>2</sup> | <i>p</i> -value |
| Overall           | Plant <sup>1</sup>     | 0.324          | <0.001          | 0.227          | <0.001          |
|                   | Replicate <sup>2</sup> | 0.016          | 1               | 0.011          | 1               |
|                   | Cropping season        | 0.125          | <0.001          | 0.164          | <0.001          |
|                   | Sampling period        | 0.072          | 0.002           | 0.172          | <0.001          |
| 2015-2016 samples | Plant <sup>1</sup>     | 0.422          | <0.001          | 0.368          | <0.001          |
|                   | Sampling period        | 0.099          | 0.021           | 0.186          | <0.001          |
| 2016-2017 samples | Plant <sup>1</sup>     | 0.418          | <0.001          | 0.300          | <0.001          |
|                   | Sampling period        | 0.118          | 0.009           | 0.241          | <0.001          |
| July 2017 samples | Plant <sup>1</sup>     | 0.755          | 0.004           | 0.696          | <0.001          |
| Wheat samples     | Crop within a rotation | 0.105          | <0.001          | 0.066          | <0.001          |
|                   | Cropping season        | 0.334          | <0.001          | 0.328          | <0.001          |

<sup>1</sup> comparison between oilseed rape and wheat, regardless of the rotation.

<sup>2</sup> five sampling points per plot.

**Figure S1** - Distribution of the most prevalent fungal genera detected in wheat residues. **(A)** Cladogram of the most prevalent genera. Genera were filtered according to their occurrence (at least three times in the five sampling points for each “crop within a rotation \* cropping season \* sampling period” combination). Unclassified genera were removed from the tree. **(B)** Number of ASV of each genus. **(C)** Occurrence of each ASV in the 100 samples of wheat residues. **(D)** Percentage of reads for each genus. **(E)** Distribution of each genus in the five samples per date (increasing number of reads shown on a scale running from yellow to red).

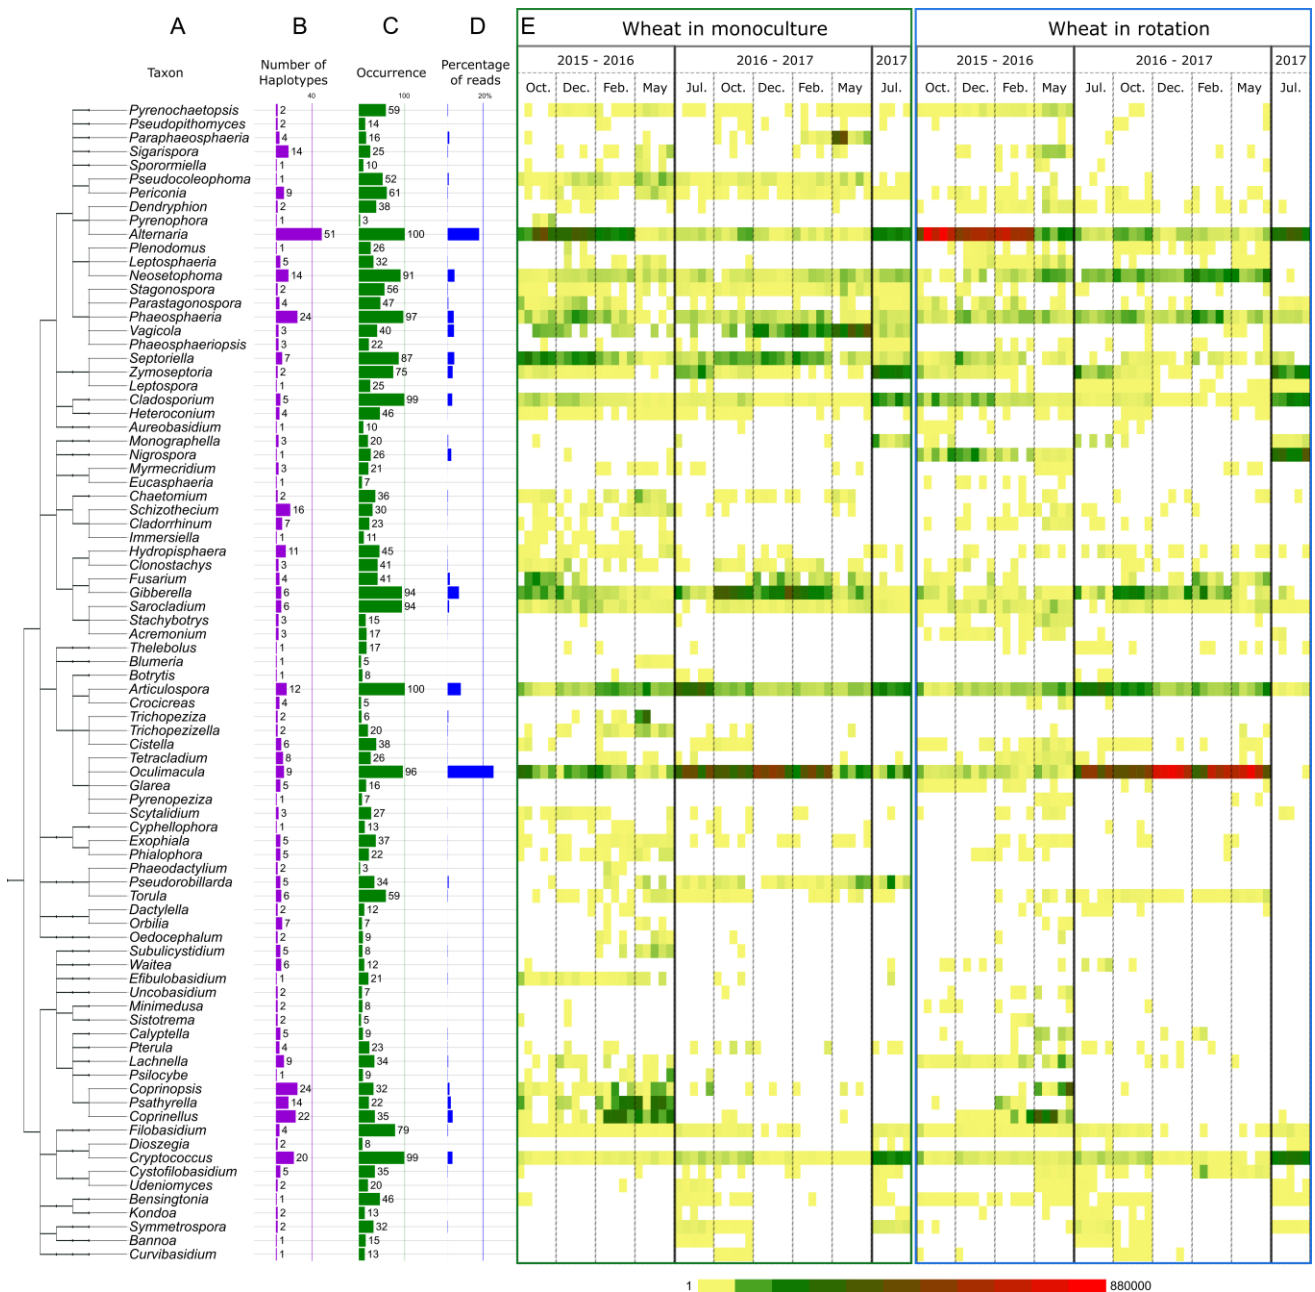

**Figure S2** - Distribution of the most prevalent fungal genera detected in oilseed rape residues. **(A)** Cladogram of the most prevalent genera. Genera were filtered according to their occurrence (at least three times in the five sampling points for each “crop within a rotation \* cropping season \* sampling period”) combination. Unclassified genera were removed from the tree. **(B)** Number of ASV for each genus. **(C)** Occurrence of each ASV in the 50 samples of oilseed rape residues. **(D)** Percentage of reads for each genus. **(E)** Distribution of each genus in the five samples per date (increasing number of reads shown on a scale from yellow to red).

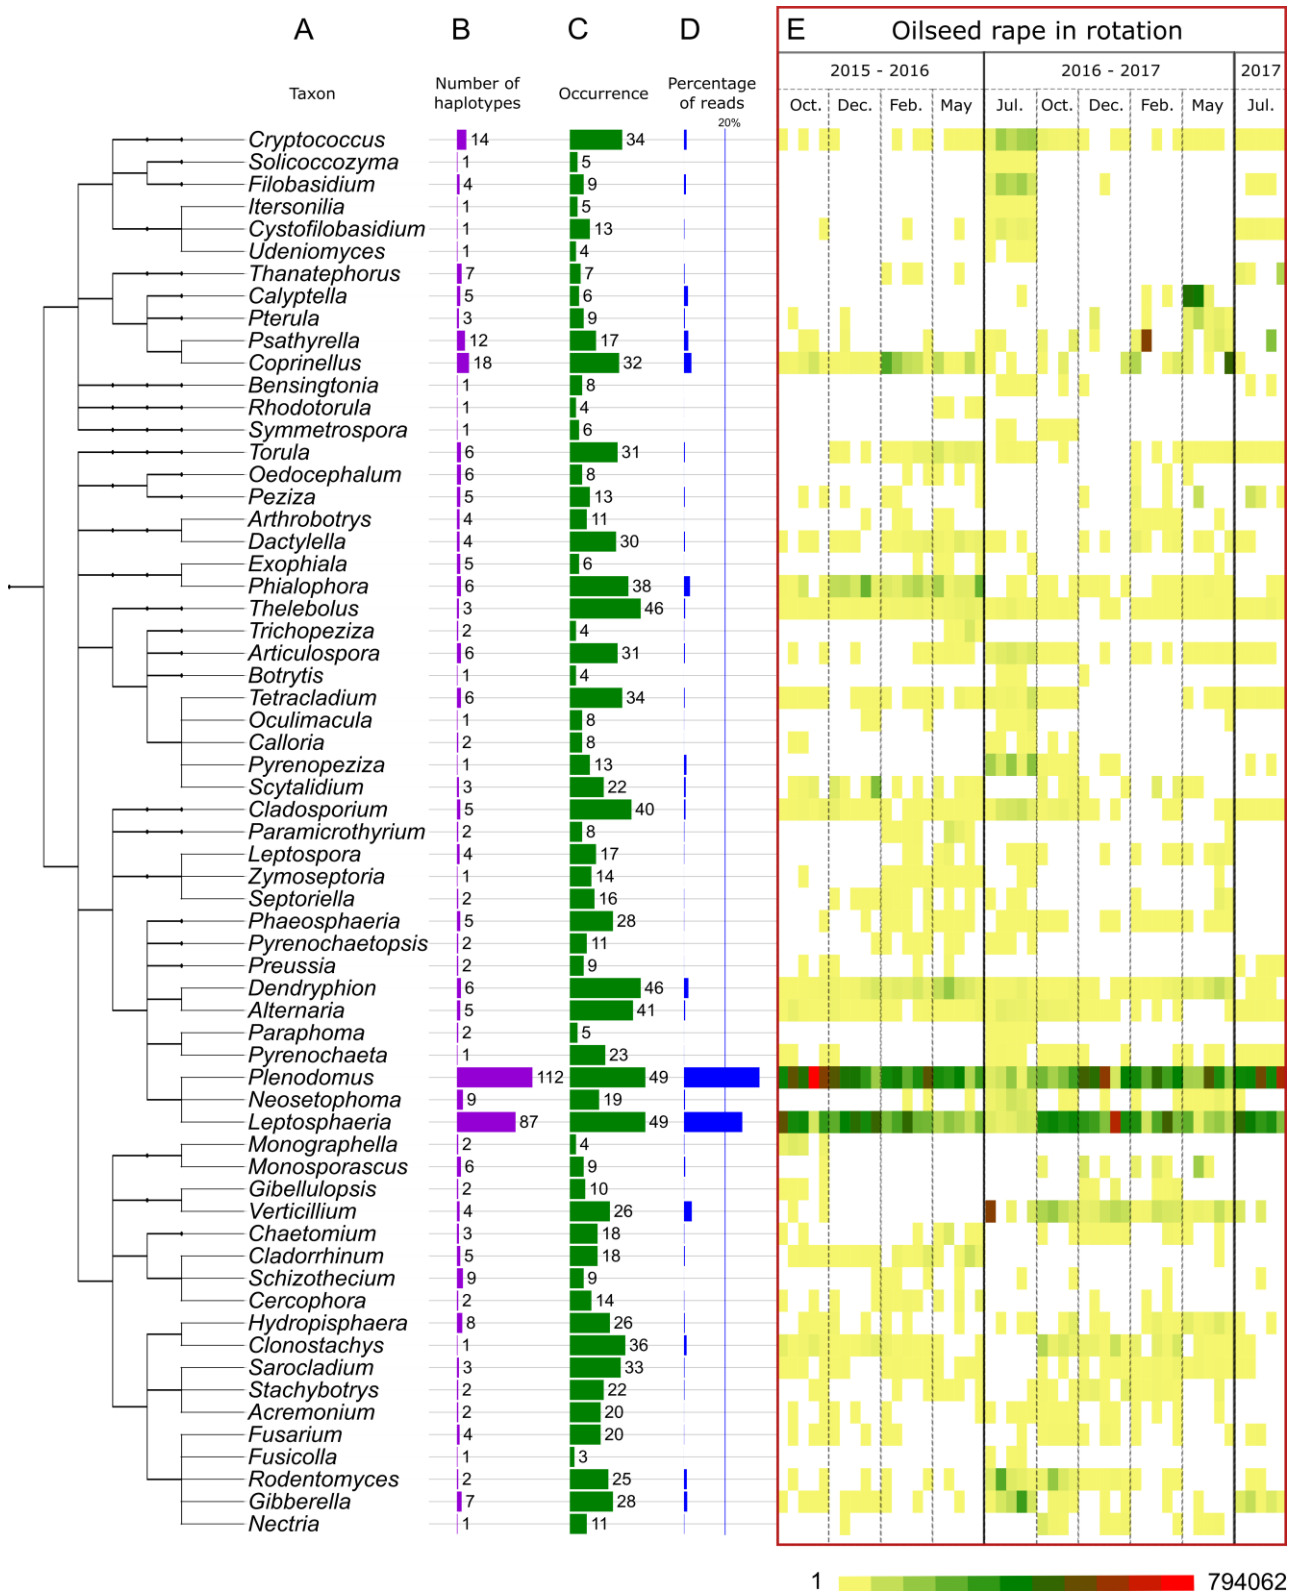

**Figure S3** - Distribution of the most prevalent bacterial genera detected in wheat residues. **(A)** Cladogram of the most prevalent genera. Genera were filtered according to their occurrence (at least three times in five sampling points for each “crop within rotation \* cropping season \* sampling period” combination). Unclassified genera were removed from the tree. **(B)** Number of ASV for each genus. **(C)** Occurrence of each ASV in the 100 samples of wheat residues. **(D)** Number of reads for each genus. **(E)** Distribution of each genus in the five samples per date (increasing numbers of reads on a scale running from yellow to red). Due to the number of genera, the plot is separated in [1] proteo- and [2] other bacteria.

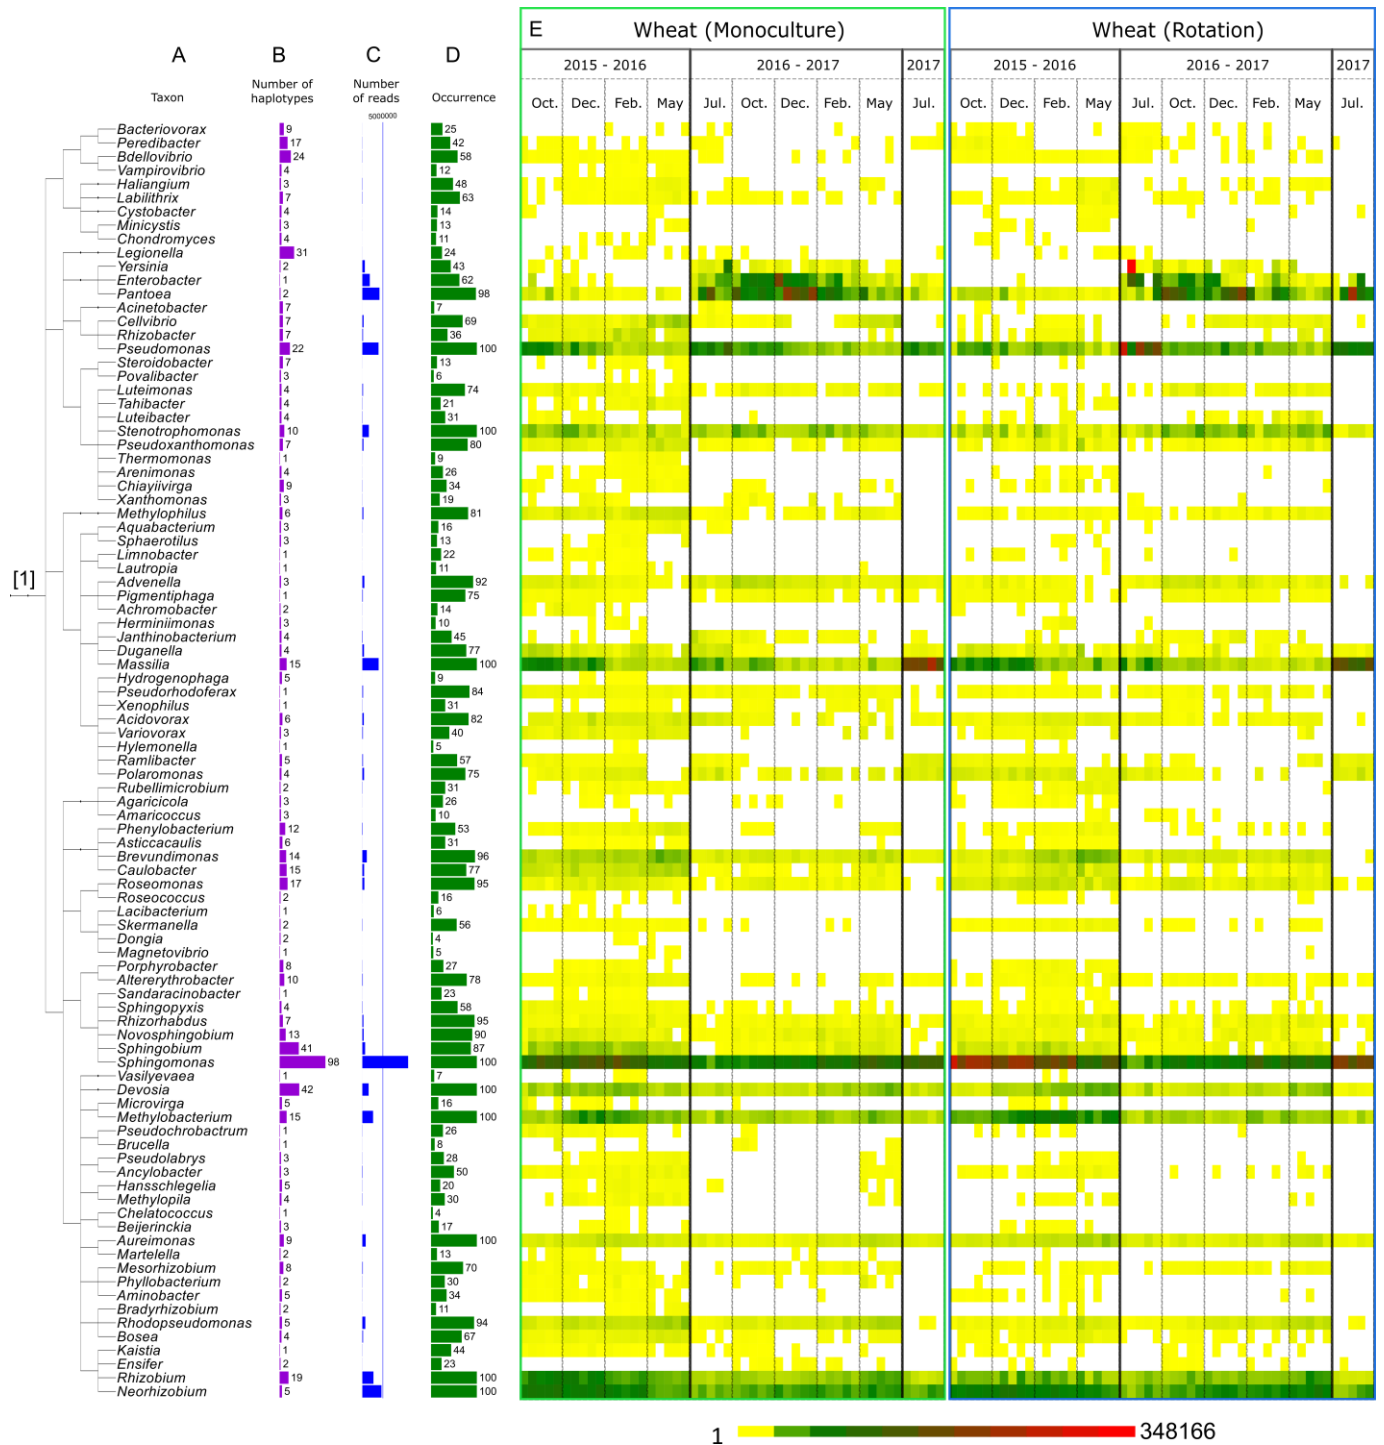



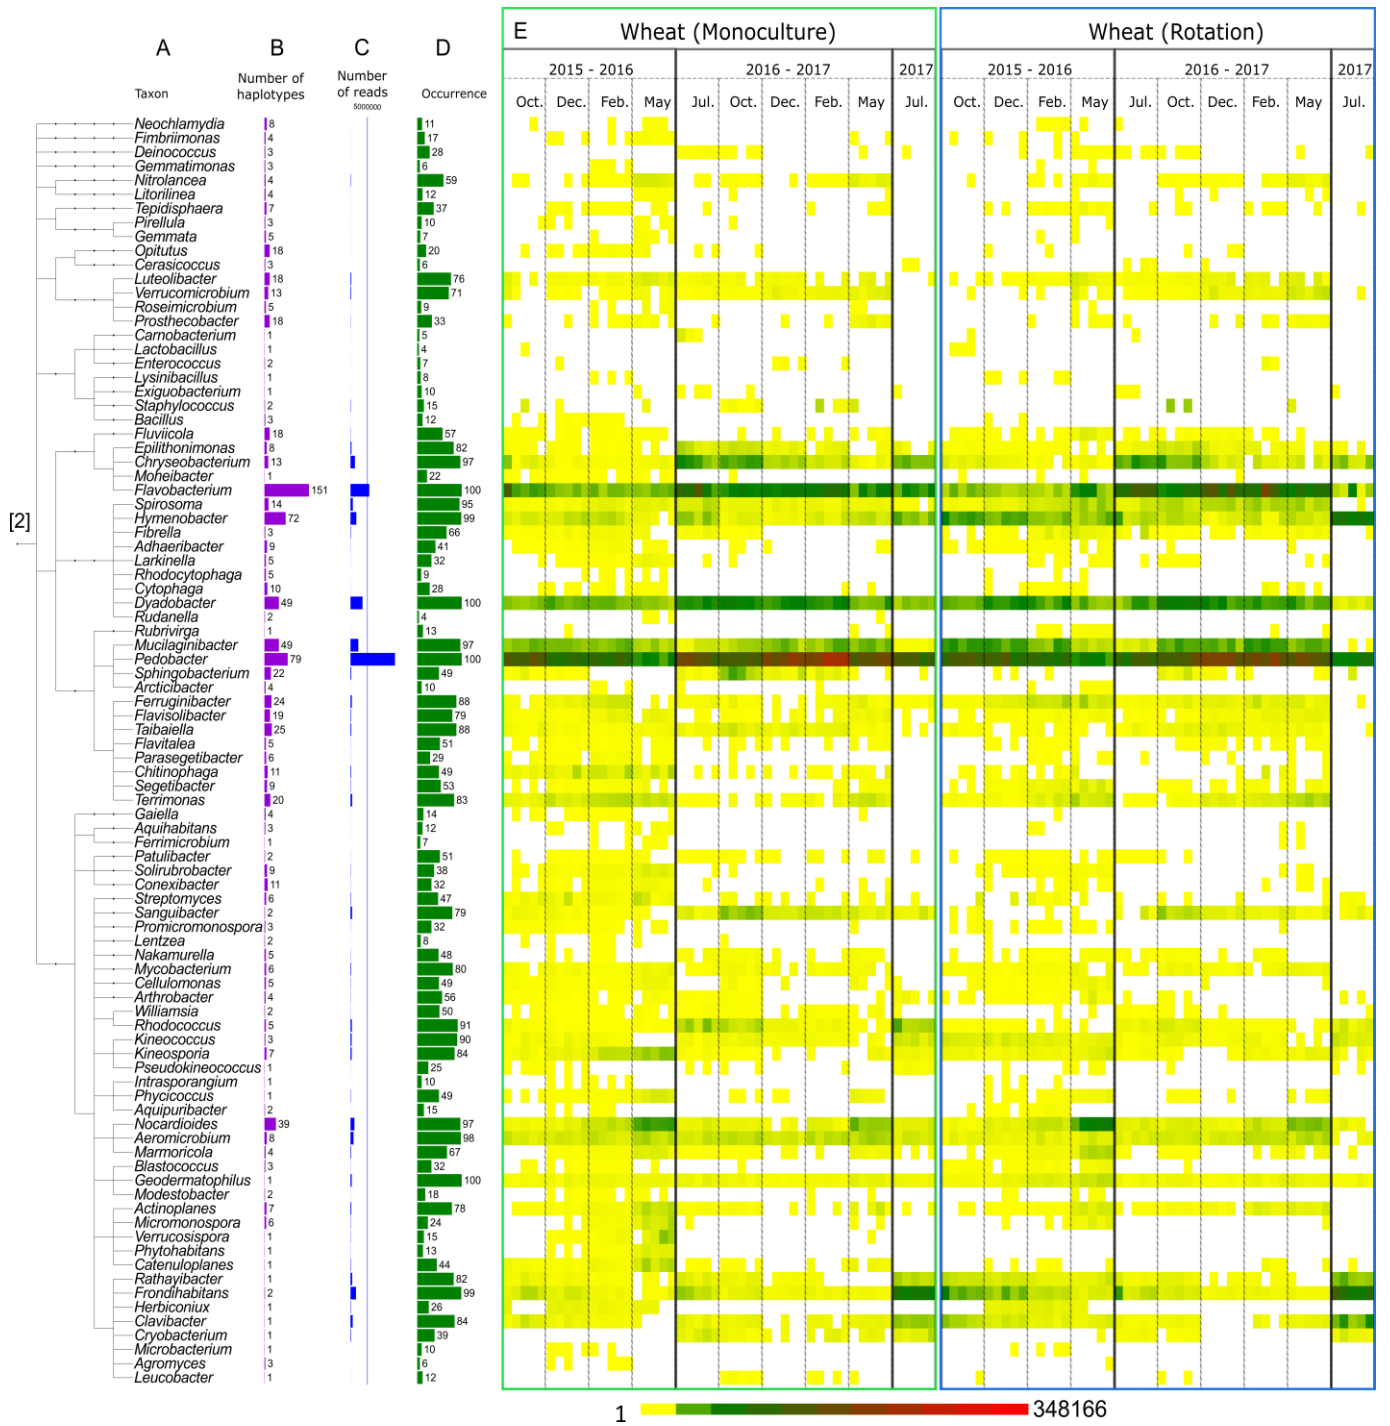

**Figure S4** - Distribution of the most prevalent bacterial genera detected in oilseed rape residues. **(A)** Cladogram of most prevalent genera. Genera were filtered according to their occurrence (at least three times in five sampling points for each “crop within rotation \* cropping season \* sampling period” combination). Unclassified genera were removed from the tree. **(B)** Number of ASV for each genus. **(C)** Occurrence of each ASV in the 49 samples of oilseed rape residues. **(D)** Number of reads for each genus. **(E)** Distribution of each genus in the five samples per date (increasing number of reads shown on a scale running from yellow to red). Due to the number of genera, the plot is separated in [1] proteo- and [2] other bacteria.

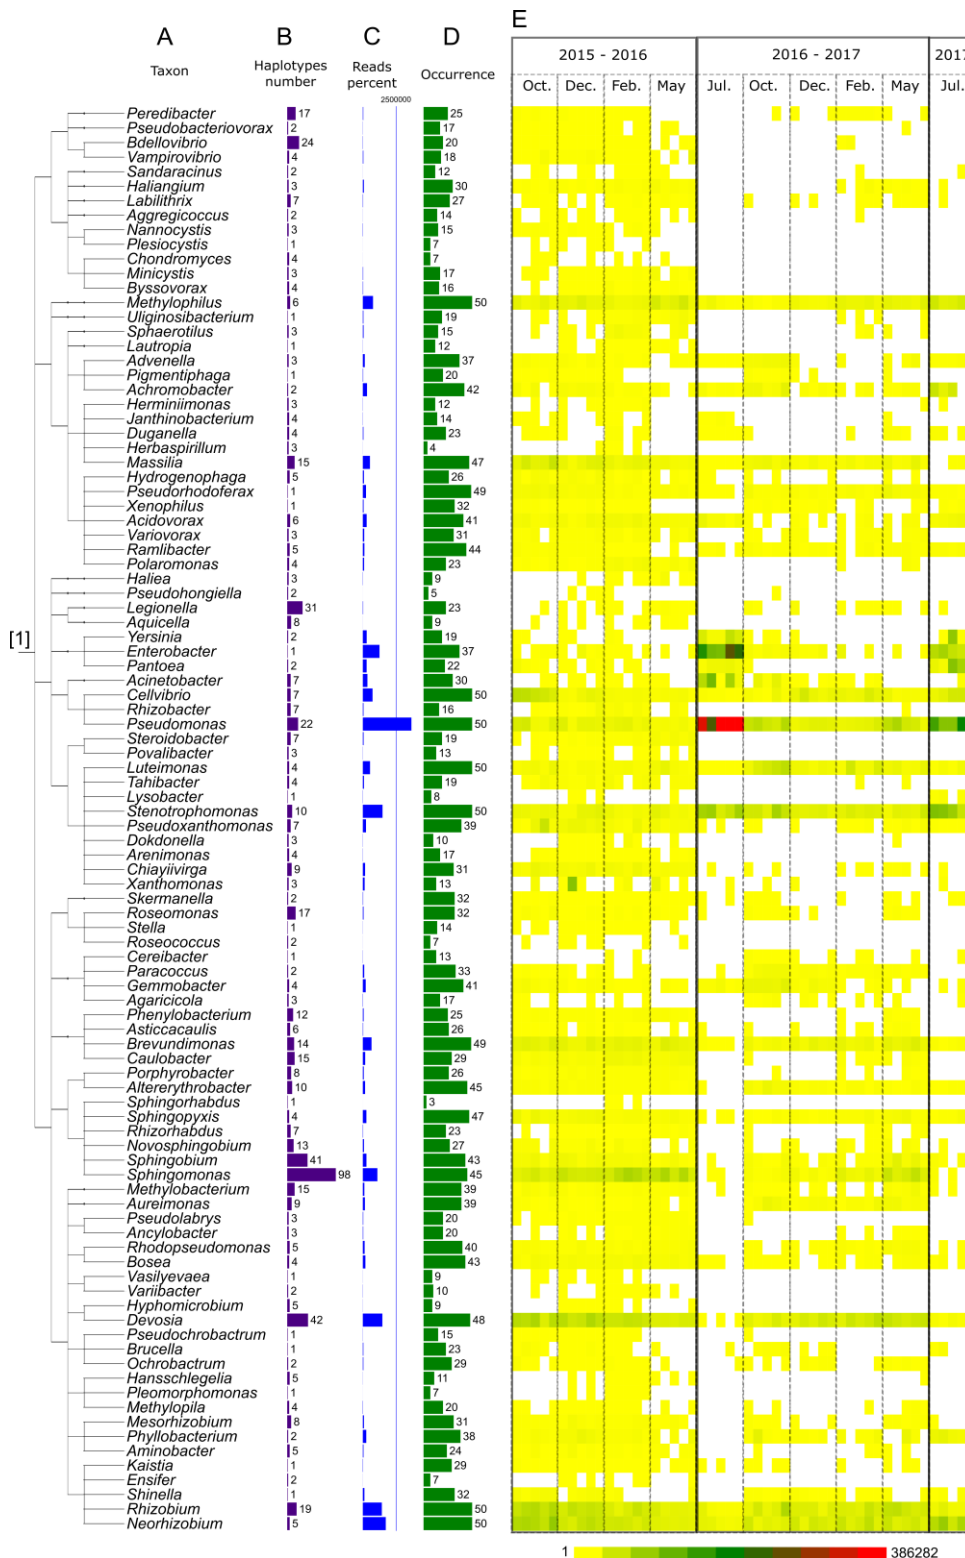

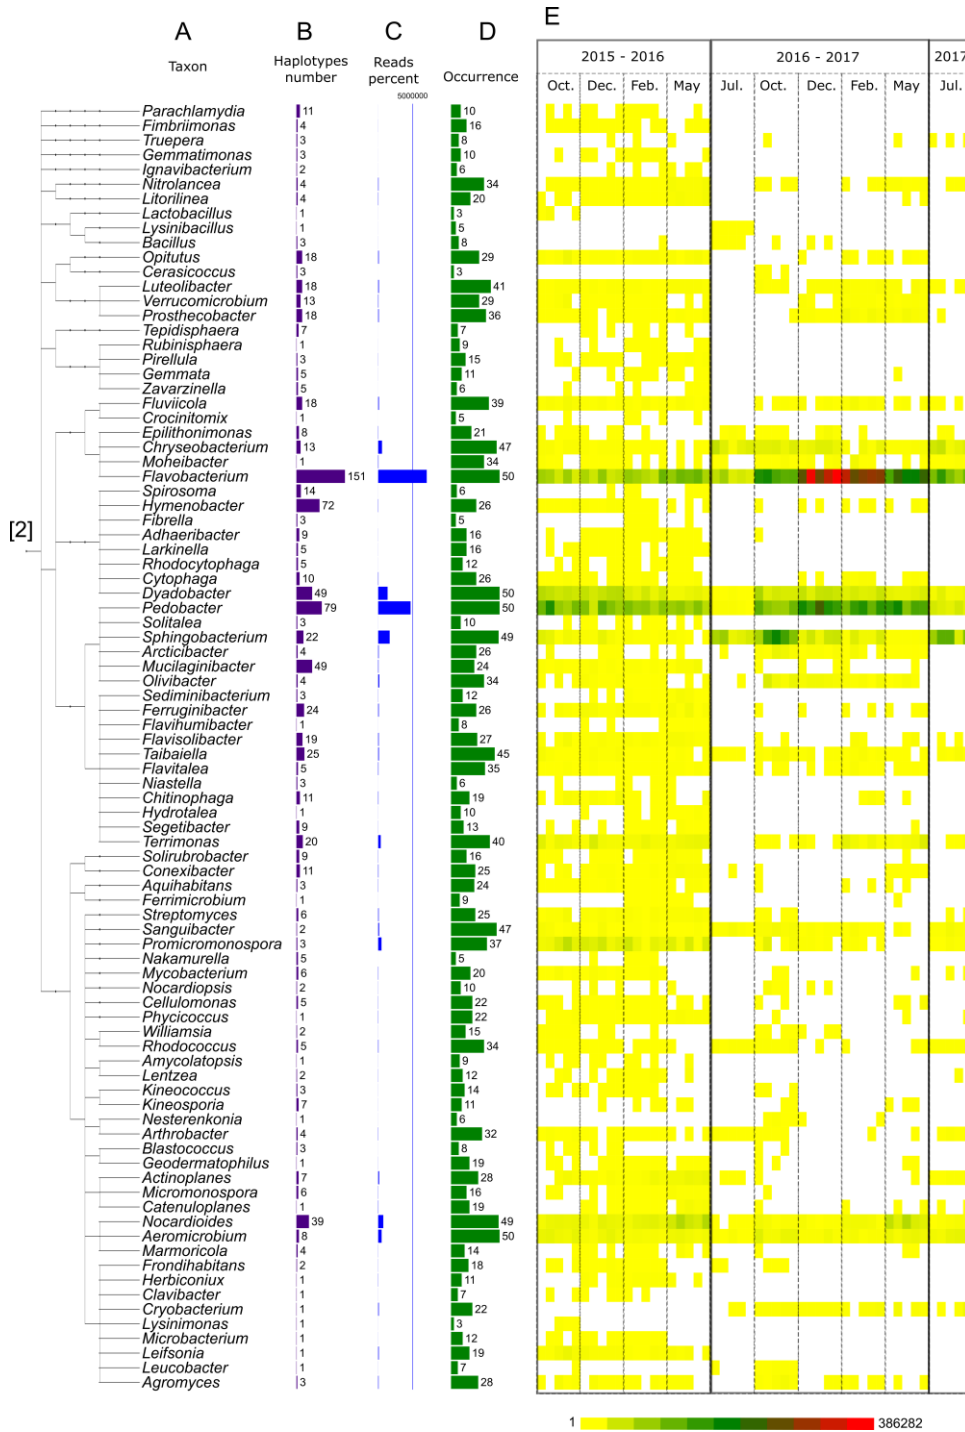

**Figure S5** - Seasonal shift in the relative abundance of a selection of fungal (**A**) and bacterial (**B**) genera present on wheat and oilseed rape residues according to the rotation (wheat monoculture [1], wheat in rotation [2], oilseed rape in rotation [3]) and the year (2015-2016, 2016-2017). Due to the high impact of the plant (wheat and oilseed rape) in the fungal community, the fungal genera used here as examples are different for the two plants, unlike the case of the bacterial community. Each box represents the distribution of genera relative abundance for the five sampling points. Samples not sharing letters are significantly different (Wilcoxon tests between sampling periods).

**A.1.**

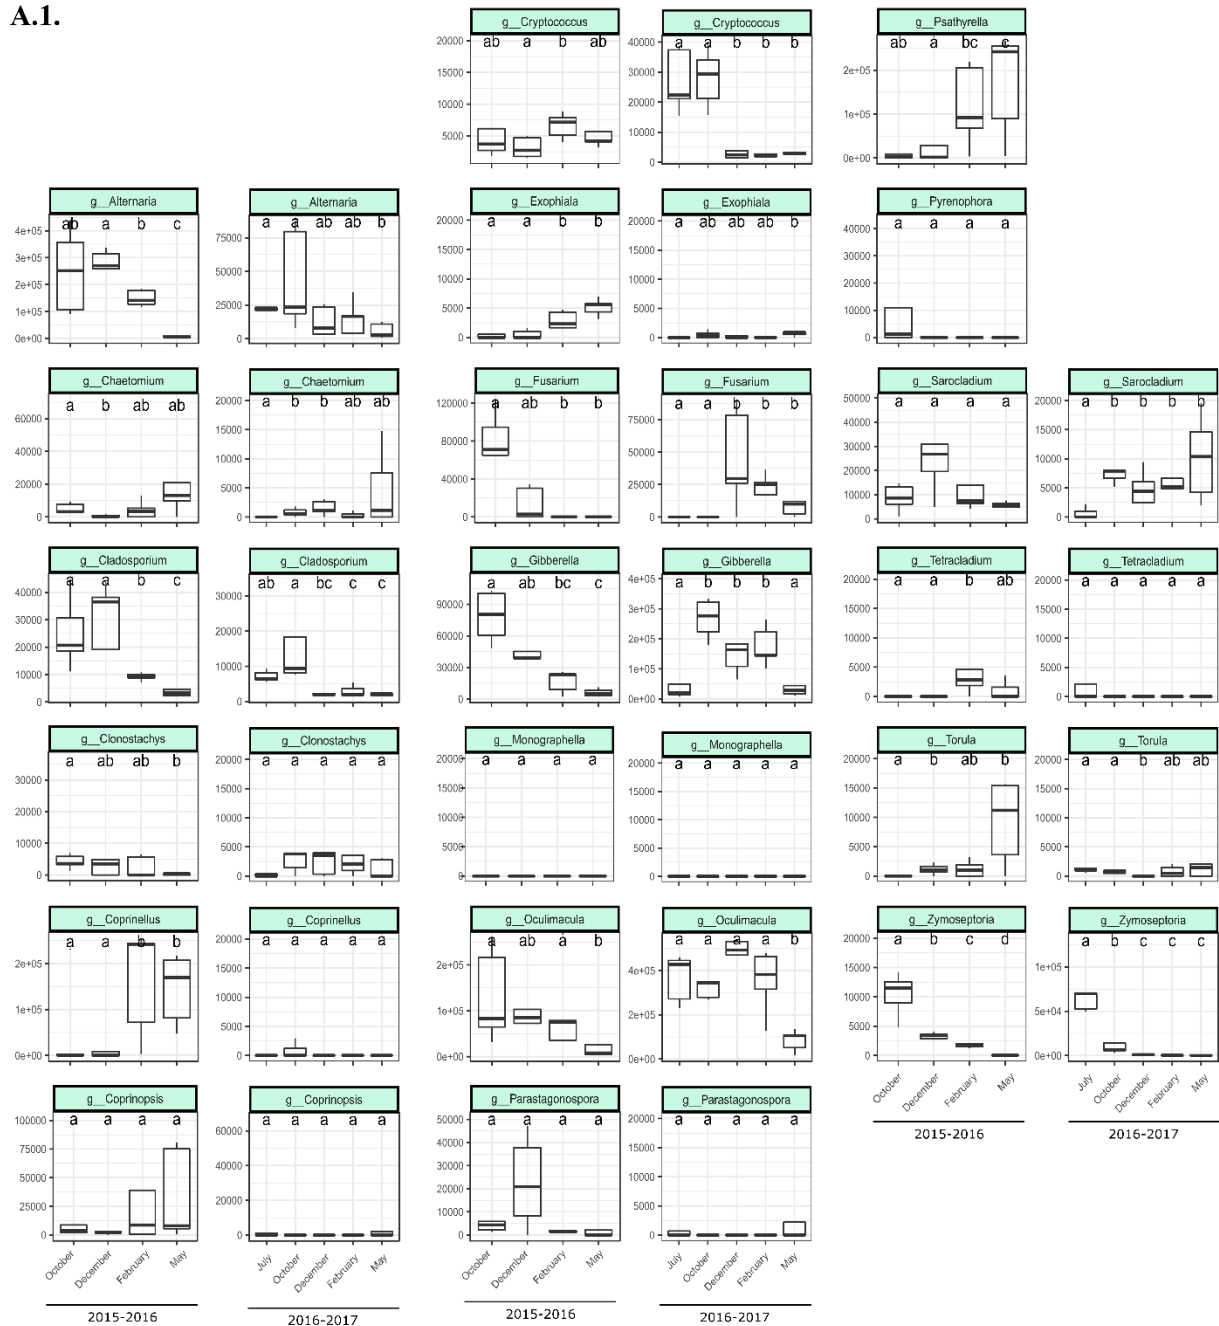

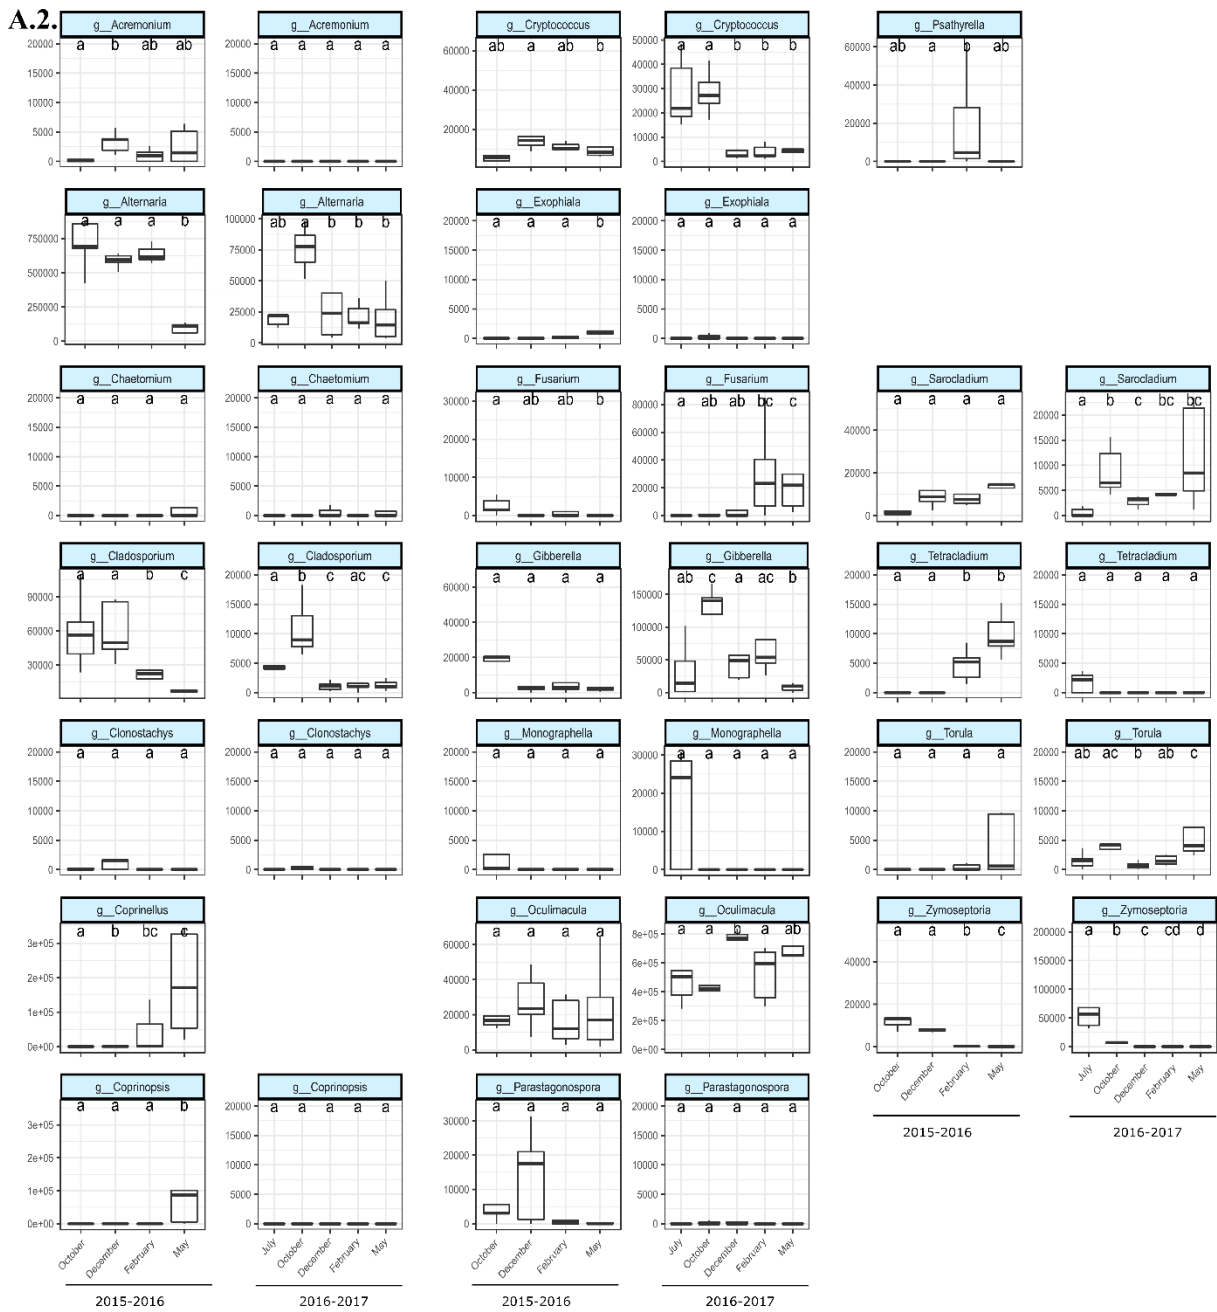

A.3.

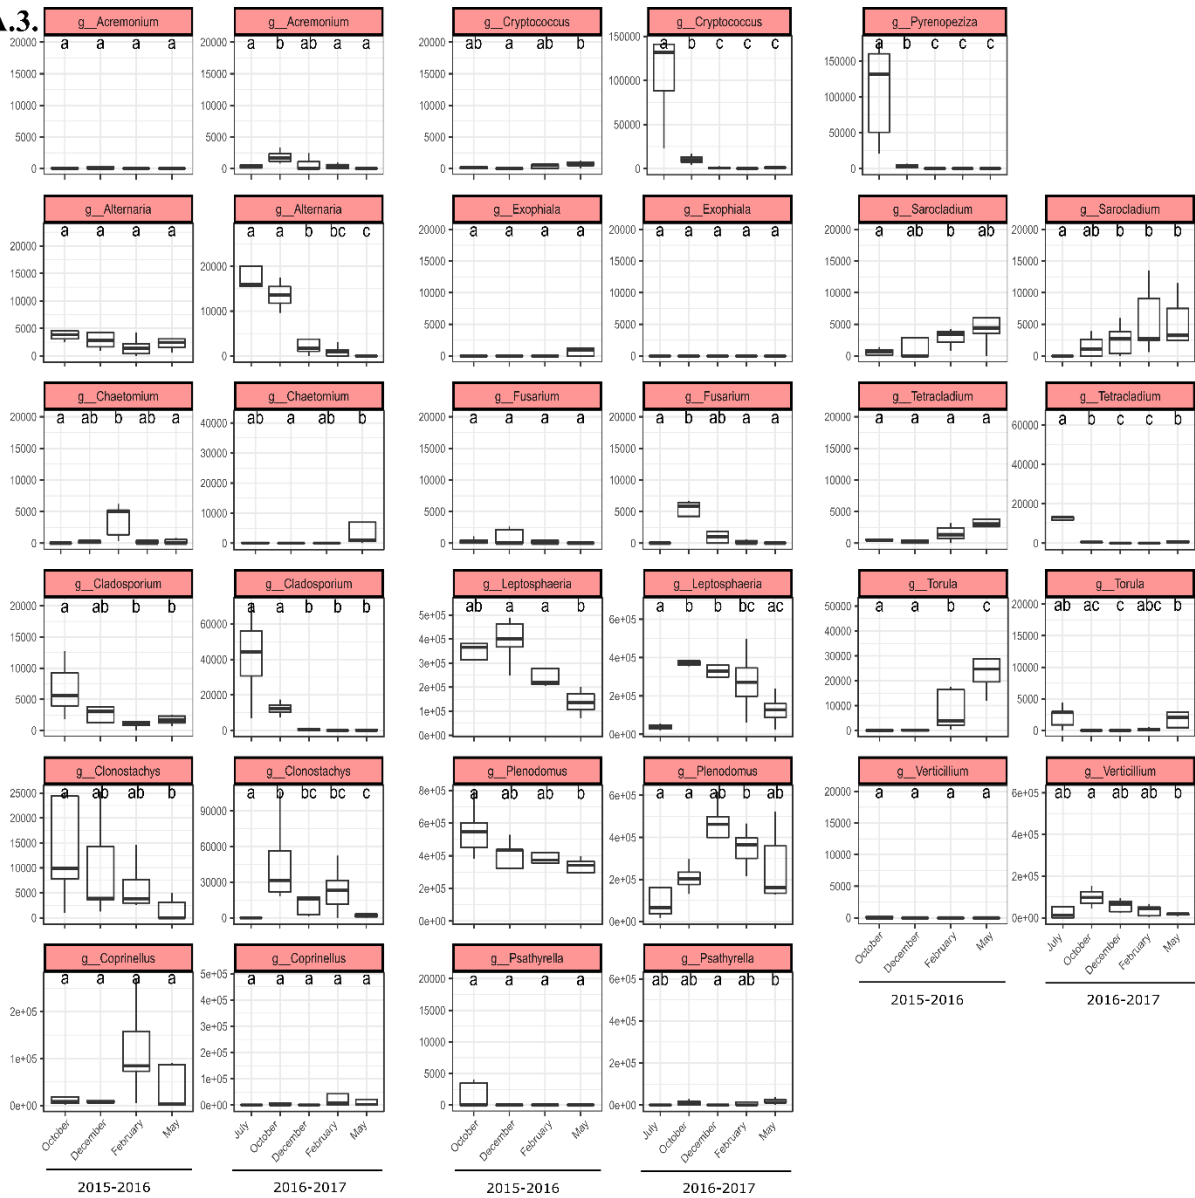

### B.1.

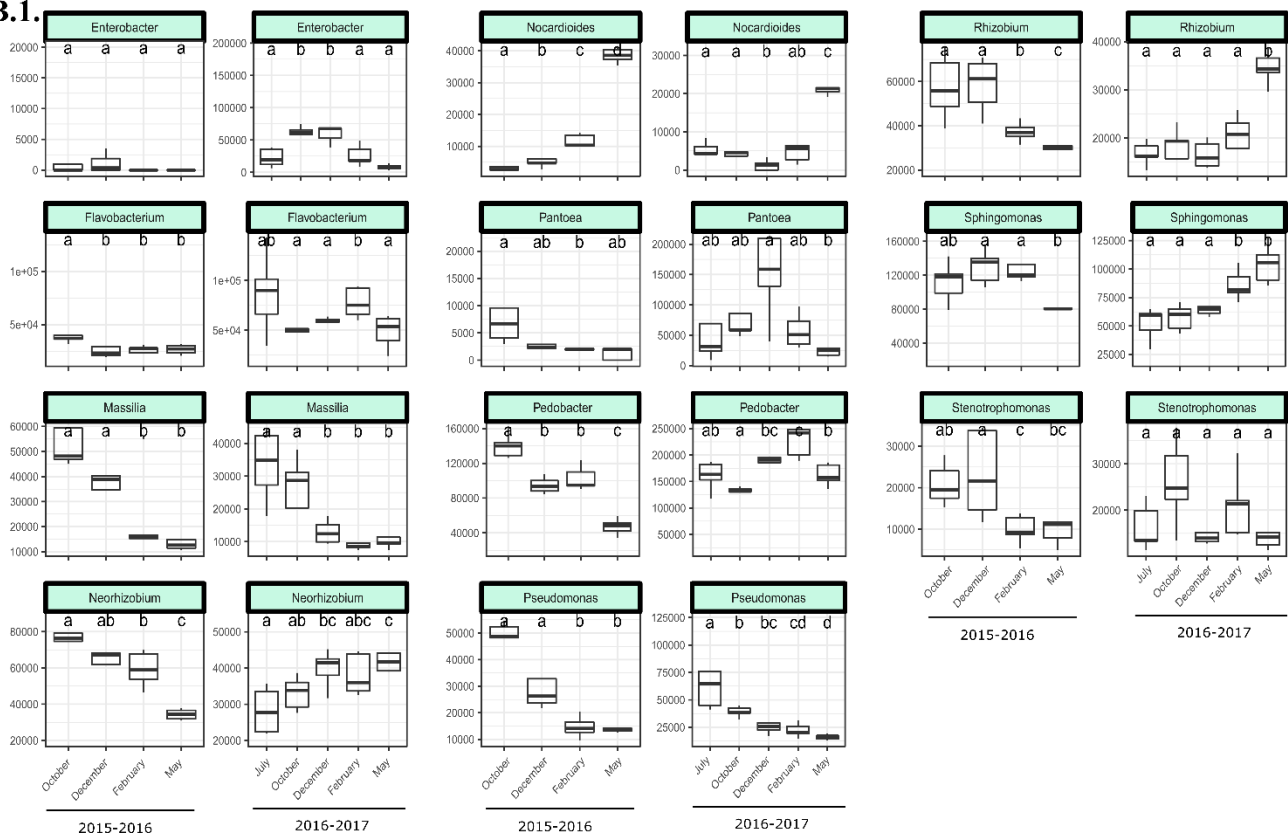

### B.2.

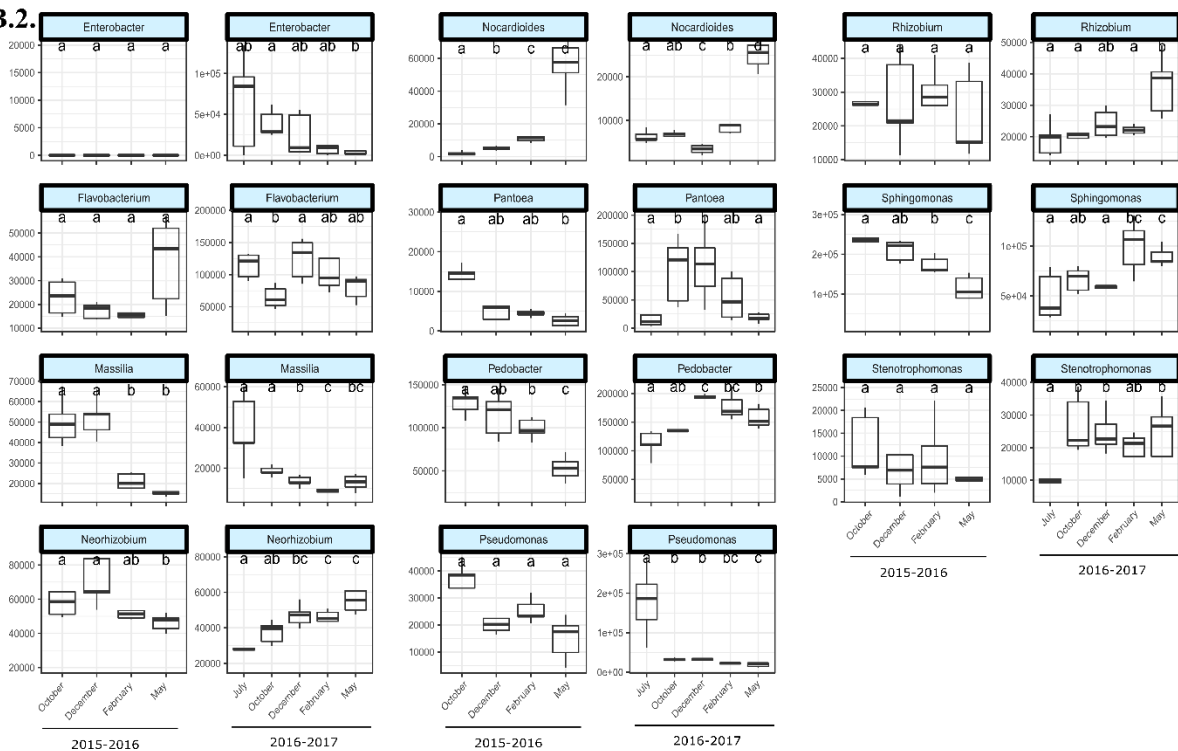



**B.3.**

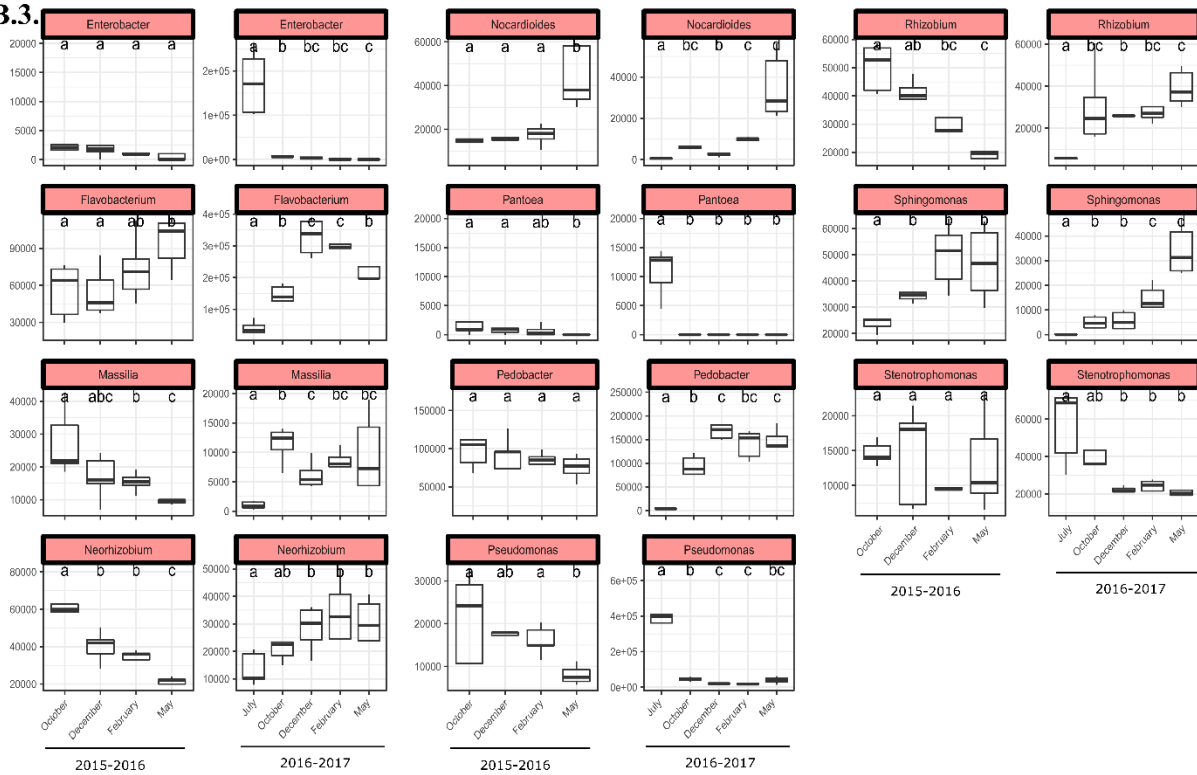

**Table S1** - Soil texture of the three plots (WWW, OWO and WOW).

|          | WWW, OWO | WOW  |
|----------|----------|------|
| Clay (%) | 27.4     | 18.2 |
| Silt (%) | 53.2     | 61.2 |
| Sand (%) | 18.8     | 20.4 |

**Table S2** - Sampling dates of wheat and oilseed rape plants (July) and residues (October, December, February and May) for each cropping season.

| Cropping season | July       | October    | December   | February   | May        |
|-----------------|------------|------------|------------|------------|------------|
| 2015-2016       | /          | 23.10.2015 | 04.12.2015 | 26.02.2016 | 19.05.2016 |
| 2016-2017       | 11.07.2016 | 17.10.2016 | 05.12.2016 | 06.02.2016 | 15.05.2017 |
| 2017-2018       | 07.07.2017 | /          | /          | /          | /          |

**Table S3** - Total number of reads and percentage (in brackets) remaining after ASV filtering.

|                      | After DADA2 | After replicate suppression | After taxon suppression |
|----------------------|-------------|-----------------------------|-------------------------|
| Bacterial reads      | 14,287,970  | 13,509,461 (94.6%)          | 13,228,976 (92.6%)      |
| Fungal reads         | 9,898,487   | 9,753,628 (98.5%)           | 9,628,995 (97.3%)       |
| Bacterial haplotypes | 19,235      | 2,905                       | 2,726                   |
| Fungal haplotypes    | 3,587       | 1,241                       | 1,189                   |

**Table S4** - Summary of meteorological data (temperature, rainfall) for the INRA Grignon experimental station (Yvelines, France), obtained from the CLIMATIK INRA database ([https://intranet.inra.fr/climatik\\_v2/](https://intranet.inra.fr/climatik_v2/)) from July 1<sup>st</sup> to May 31<sup>st</sup> of the following year, for the cropping seasons 2015-2016 and 2016-2017.

|         | 10-day mean temperature (°C) |           | 10-day cumulative rainfall (mm) |           |
|---------|------------------------------|-----------|---------------------------------|-----------|
|         | 2015-2016                    | 2016-2017 | 2015-2016                       | 2016-2017 |
| Mean    | 11.2                         | 10.8      | 22.6                            | 12.3      |
| Minimum | 2.0                          | 0.9       | 0                               | 0         |
| Maximum | 21.8                         | 21.4      | 131                             | 55        |

**Table S5** - *P*-values from Wilcoxon pairwise test comparisons for bacterial and fungal diversity. The *p*-values were calculated from the Shannon index between crops within a rotation (wheat in monoculture, i.e. in WWW; wheat in rotation, i.e. in WOW or OWO; oilseed rape in rotation, i.e. in OWO or WOW) or between crops whatever the rotation (wheat; oilseed rape) for each year. Pairwise tests were performed for all sampling periods in each cropping season (20 samples for each crop within a rotation in 2015- 2016; 25 in 2016-2017; 5 in July 2017). Significant *p*-values are underlined.

| Pairwise comparisons   |                                        | 2015-2016        | 2016-2017        | July 2017    |
|------------------------|----------------------------------------|------------------|------------------|--------------|
| Bacterial<br>diversity | Wheat (monoculture) – Wheat (rotation) | <u>&lt;0.001</u> | 0.801            | <u>0.012</u> |
|                        | Wheat (rotation) – Oilseed rape        | <u>&lt;0.001</u> | <u>0.004</u>     | <u>0.037</u> |
|                        | Wheat (monoculture) – Oilseed rape     | 0.297            | <u>0.004</u>     | <u>0.037</u> |
|                        | Wheat – Oilseed rape                   | 0.1              | <u>&lt;0.001</u> | 1            |
| Fungal<br>diversity    | Wheat (monoculture) – Wheat (rotation) | <u>0.001</u>     | <u>0.0018</u>    | <u>0.012</u> |
|                        | Wheat (rotation) – Oilseed rape        | <u>&lt;0.001</u> | 0.849            | <u>0.012</u> |
|                        | Wheat (monoculture) – Oilseed rape     | <u>&lt;0.001</u> | <u>0.002</u>     | <u>0.012</u> |
|                        | Wheat – Oilseed Rape                   | <u>&lt;0.001</u> | 0.095            | <u>0.03</u>  |

**Table S6** - Plant effect (wheat vs. oilseed rape) on community dispersion. This effect was tested by applying the Adonis function of the vegan R package to the Bray-Curtis dissimilarity index (PERMANOVA). *P*-values (not shown) were all < 0.02.

|          | Fungi |           |           |       | Bacteria |           |           |       |
|----------|-------|-----------|-----------|-------|----------|-----------|-----------|-------|
|          | All   | 2015-2016 | 2016-2017 | 2017  | All      | 2015-2016 | 2016-2017 | 2017  |
| July     | 0.372 | /         | 0.611     | 0.755 | 0.423    | /         | 0.540     | 0.696 |
| October  | 0.495 | 0.612     | 0.755     | /     | 0.367    | 0.520     | 0.659     | /     |
| December | 0.486 | 0.688     | 0.691     | /     | 0.370    | 0.573     | 0.641     | /     |
| February | 0.429 | 0.541     | 0.651     | /     | 0.409    | 0.643     | 0.611     | /     |
| May      | 0.273 | 0.337     | 0.401     | /     | 0.315    | 0.435     | 0.508     | /     |



**Table S7** - Decomposition of dissimilarity due to temporal changes in fungal (F) and bacterial (B) community composition. Total dissimilarity is broken down into turnover (replacement of ASV) and nestedness (gain or loss of ASV).

| Crop within a rotation | Season    | Sampling period compared | Total dissimilarity |       | Turnover |       | Nestedness |       |
|------------------------|-----------|--------------------------|---------------------|-------|----------|-------|------------|-------|
|                        |           |                          | F                   | B     | F        | B     | F          | B     |
| Oilseed rape           | 2015-2016 | Oct. - Dec.              | 0.622               | 0.318 | 0.618    | 0.219 | 0.005      | 0.099 |
| Oilseed rape           | 2015-2016 | Dec. - Feb.              | 0.650               | 0.321 | 0.577    | 0.290 | 0.073      | 0.031 |
| Oilseed rape           | 2015-2016 | Feb. - May               | 0.591               | 0.390 | 0.565    | 0.202 | 0.027      | 0.188 |
| Oilseed rape           | 2016-2017 | Jul. - Oct.              | 0.652               | 0.554 | 0.648    | 0.250 | 0.004      | 0.304 |
| Oilseed rape           | 2016-2017 | Oct. - Dec.              | 0.620               | 0.353 | 0.549    | 0.217 | 0.071      | 0.136 |
| Oilseed rape           | 2016-2017 | Dec. - Feb.              | 0.585               | 0.353 | 0.516    | 0.276 | 0.068      | 0.077 |
| Oilseed rape           | 2016-2017 | Feb. - May               | 0.529               | 0.384 | 0.529    | 0.342 | 0.000      | 0.042 |
| Wheat in monoculture   | 2015-2016 | Oct. - Dec.              | 0.427               | 0.330 | 0.425    | 0.142 | 0.002      | 0.188 |
| Wheat in monoculture   | 2015-2016 | Dec. - Feb.              | 0.444               | 0.294 | 0.416    | 0.190 | 0.028      | 0.104 |
| Wheat in monoculture   | 2015-2016 | Feb. - May               | 0.444               | 0.458 | 0.424    | 0.255 | 0.020      | 0.203 |
| Wheat in monoculture   | 2016-2017 | Jul. - Oct.              | 0.438               | 0.346 | 0.424    | 0.300 | 0.014      | 0.046 |
| Wheat in monoculture   | 2016-2017 | Oct. - Dec.              | 0.463               | 0.330 | 0.257    | 0.113 | 0.207      | 0.217 |
| Wheat in monoculture   | 2016-2017 | Dec. - Feb.              | 0.386               | 0.248 | 0.311    | 0.200 | 0.075      | 0.048 |
| Wheat in monoculture   | 2016-2017 | Feb. - May               | 0.344               | 0.332 | 0.341    | 0.213 | 0.004      | 0.120 |
| Wheat in rotation      | 2015-2016 | Oct. - Dec.              | 0.425               | 0.317 | 0.409    | 0.157 | 0.016      | 0.160 |
| Wheat in rotation      | 2015-2016 | Dec. - Feb.              | 0.472               | 0.266 | 0.370    | 0.185 | 0.102      | 0.081 |
| Wheat in rotation      | 2015-2016 | Feb. - May               | 0.505               | 0.347 | 0.432    | 0.311 | 0.073      | 0.035 |
| Wheat in rotation      | 2016-2017 | Jul. - Oct.              | 0.498               | 0.313 | 0.427    | 0.272 | 0.071      | 0.041 |
| Wheat in rotation      | 2016-2017 | Oct. - Dec.              | 0.541               | 0.287 | 0.292    | 0.214 | 0.249      | 0.073 |
| Wheat in rotation      | 2016-2017 | Dec. - Feb.              | 0.350               | 0.284 | 0.292    | 0.284 | 0.059      | 0.000 |
| Wheat in rotation      | 2016-2017 | Feb. - May               | 0.424               | 0.334 | 0.329    | 0.287 | 0.095      | 0.047 |
| Mean                   |           |                          | 0.496               | 0.341 | 0.436    | 0.234 | 0.060      | 0.107 |
